# 1 Copy-scAT: Deconvoluting single-cell chromatin accessibility of genetic subclones in cancer

2

3 Ana Nikolic<sup>1,2,3</sup>, Divya Singhal<sup>1,2,3</sup>, Katrina Ellestad<sup>1,2,3</sup>, Michael Johnston<sup>1,2,3</sup>, Aaron Gillmor<sup>1,2,3</sup>, Sorana  
4 Morrissy<sup>1,2,3</sup>, Jennifer A Chan<sup>1,2,4</sup>, Paola Neri<sup>1,4</sup>, Nizar Bahlis<sup>1,4</sup>, Marco Gallo<sup>1,2,3\*</sup>

5

6 <sup>1</sup>Arnie Charbonneau Cancer Institute

7 <sup>2</sup>Alberta Children's Hospital Research Institute

8 <sup>3</sup>Department of Biochemistry and Molecular Biology

9 <sup>4</sup>Department of Oncology

10 Cumming School of Medicine, University of Calgary, Calgary, AB, Canada

11

12 \*Corresponding author: Marco Gallo

13 [marco.gallo@ucalgary.ca](mailto:marco.gallo@ucalgary.ca)

14

15

16

## ABSTRACT

17 Single-cell epigenomic assays have tremendous potential to illuminate mechanisms of transcriptional control  
18 in functionally diverse cancer cell populations. However, application of these techniques to clinical tumor  
19 specimens has been hampered by the current inability to distinguish malignant from non-malignant cells,  
20 which potently confounds data analysis and interpretation. Here we describe Copy-scAT, an R package that  
21 uses single-cell epigenomic data to infer copy number variants (CNVs) that define cancer cells. Copy-scAT  
22 enables studies of subclonal chromatin dynamics in complex tumors like glioblastoma. By deploying Copy-  
23 scAT, we uncovered potent influences of genetics on chromatin accessibility profiles in individual subclones.  
24 Consequently, some genetic subclones were predisposed to acquire stem-like or more differentiated  
25 molecular phenotypes, reminiscent of developmental paradigms. Copy-scAT is ideal for studies of the  
26 relationships between genetics and epigenetics in malignancies with high levels of intratumoral heterogeneity  
27 and to investigate how cancer cells interface with their microenvironment.

28

29

## 30 INTRODUCTION

31

32 Single-cell genomic technologies have made enormous contributions to the deconvolution of complex  
33 cellular systems, including cancer (1). Single-cell RNA sequencing (scRNA-seq) in particular has been widely  
34 employed to understand the implications of intratumoral transcriptional heterogeneity for tumor growth,  
35 response to therapy and patient prognosis (2–6). This field has hugely benefited from an emerging ecosystem  
36 of computational tools that have enabled complex analyses of scRNA data. Since copy number variants  
37 (CNVs) mostly accrue in malignant cells and are rare in non-malignant tissues, computational platforms that  
38 use scRNA data to call CNVs have resulted in improved understanding of the behavior of genetic subclones  
39 in tumors (7–9).

40 On the other hand, the application of single-cell epigenomic techniques, including the assay for transposase  
41 accessible chromatin (scATAC) (10, 11), to study cancer has been slowed by computational bottlenecks. For  
42 instance, unlike scRNA-seq, currently no dedicated tool exists to call CNVs using scATAC data. This  
43 technical gap has prevented scATAC studies of clinical tumor specimens, which often are surgical resections

44 that include both malignant and non-malignant cells. Inability to deconvolute these cell populations after the  
45 generation of scATAC datasets would confound downstream analyses and interpretation of this data type.

46 In this report, we describe Copy-scAT (Copy number inference using scATAC-seq data), a new  
47 computational tool that uses scATAC datasets to call CNVs at the single-cell level. Using scATAC datasets  
48 from adult glioblastoma (aGBM), pediatric GBM (pGBM) and multiple myeloma (MM), we demonstrate the  
49 effectiveness of Copy-scAT in calling (A) focal amplifications, (B) segmental gains and losses and (C)  
50 chromosome arm-level gains and losses. At the most basic level, Copy-scAT can therefore discriminate  
51 between malignant and non-malignant cells in scATAC datasets based on the presence or absence,  
52 respectively, of CNVs. This distinction is fundamental to ensure that downstream analyses include only the  
53 appropriate tumor or microenvironment cell populations. At a more sophisticated level, we show that  
54 implementation of Copy-scAT allows investigations of the relationship between genetic and epigenetic  
55 principles governing the behavior of individual subclones. In this regard, we show that each genetic subclone  
56 has characteristic accessible chromatin profiles, indicating that genetics imparts information that determines  
57 key epigenetic features. Strong influence of genetics on chromatin states is demonstrated by the  
58 predisposition of genetic subclones to have stem-like or more differentiated molecular profiles in GBM.

59

## 60 RESULTS

61

### 62 Design and implementation of Copy-scAT

63 We designed Copy-scAT, an R package that uses scATAC-seq information to infer copy number alterations.  
64 Copy-scAT uses fragment files generated by cellranger-atac (10xGenomics) as input to generate chromatin  
65 accessibility pileups, keeping only barcodes with a minimum number of fragments (defaulting to 5,000  
66 fragments). It then generates a pileup of total coverage (number of reads  $\times$  read lengths) over bins of  
67 determined length (1 million bp as default) (**Fig. 1a**). Binned read counts then undergo linear normalization  
68 over the total signal in each cell to account for differences in read depth, and chromosomal bins which  
69 consist predominantly of zeros (at least 80% zero values) are discarded from further analysis. All parameters,  
70 including reference genome, bin size, and minimum length cut-off are user-customizable. Copy-scAT then  
71 implements different algorithms to detect focal amplifications and larger-scale copy number variation.

72 To call focal amplifications (**Fig. 1b**), Copy-scAT generates a linear scaled profile of density over normalized  
73 1 Mbp bins along each chromosome on a single-cell basis, centering on the median and scaling using the  
74 range. Copy-scAT then uses changepoint analysis (12) (see Methods) to identify segments of abnormally high  
75 signal ( $Z$  score  $> 5$ ) along each chromosome in each single cell. These calls are then pooled together to  
76 generate consensus regions of amplification, in order to identify putative double minutes and  
77 extrachromosomal amplifications. Each cell is scored as positive or negative for each amplified genomic  
78 region.

79 Segmental losses are called in a similar fashion, by calculating a quantile for each bin on a chromosome,  
80 running changepoint analysis to identify regions with abnormally low average signal, and then using Gaussian  
81 decomposition of total signal in that region to identify distinct clusters of cells.

82 For larger copy number alterations, Copy-scAT pools the bins further at the chromosome arm level using a  
83 trimmed mean, while normalizing the data on the basis of length of CpG islands contained in each bin (**Fig.**  
84 **1c**). Data is then scaled for each chromosome arm, compared to a pseudodiploid control (expected signal  
85 distribution for a diploid genotype) that is modeled for each sample, and cluster assignments are generated  
86 using Gaussian decomposition. Cluster assignments are then normalized to get an estimate of copy number

87 for each cell (**Fig. 1d**). These assignments can be optionally combined with clustering information to  
 88 generate consensus genotypes for each cluster of cells and further filter false positives (**Fig. 1e**) For full  
 89 details regarding the execution of Copy-scAT, see Methods. A step-by-step tutorial for Copy-scAT is  
 90 available on GitHub (see Methods).

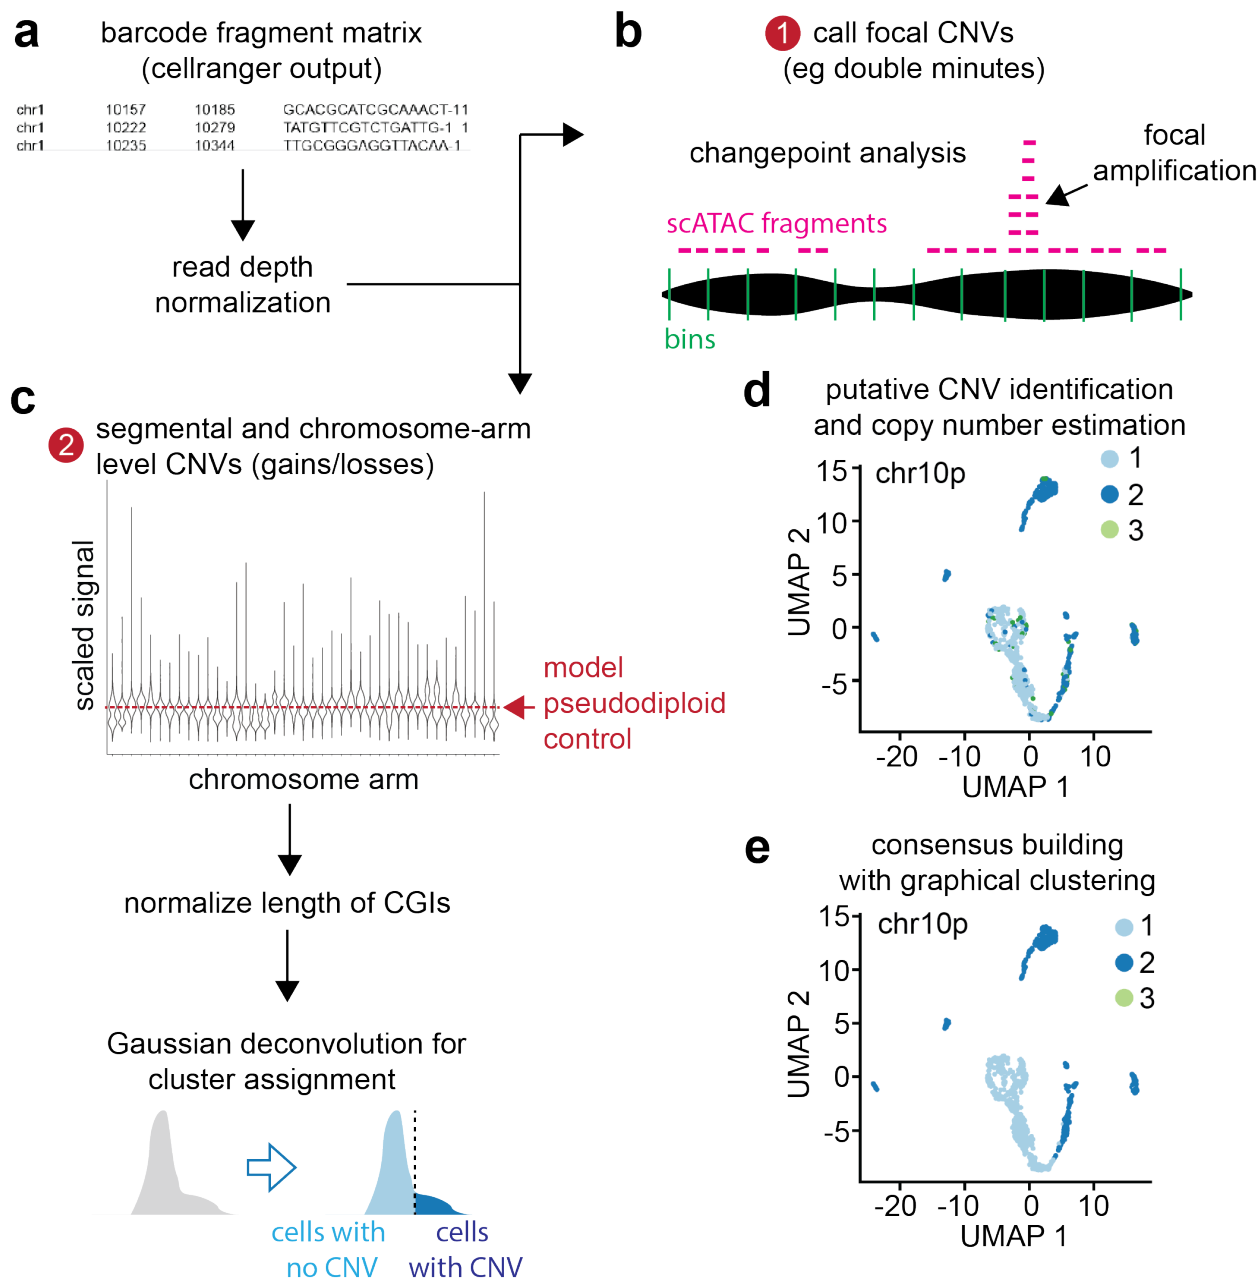

91

92 **Fig. 1. Copy-scAT workflow.**

93 (a) Copy-scAT accepts barcode fragment matrices generated by cellranger (10xGenomics) as input.

94 (b) Large peaks in normalized coverage matrices can be used to infer focal CNVs.

95 (c) Normalized matrices can be used to infer segmental and chromosome-arm level CNVs.

96 (d) Example of chromosome-arm level CNV (chromosome 10p loss) called by Copy-scAT

97 (e) Consensus clustering is used to finalize cell assignment.

98

## 99 Copy-scAT effectively calls CNVs in diverse malignancies

100 We have tested the ability of Copy-scAT to use scATAC data to call CNVs with three different approaches  
101 and with different tumor types. First, we benchmarked Copy-scAT against CNV calls made with whole-  
102 genome sequencing (WGS) data for adult GBM (aGBM) surgical resections (n = 4 samples, 3,647 cells). This  
103 approach consisted in isolating nuclei from flash-frozen aGBM samples, mixing nuclei in suspension, and  
104 then using these nuclei for either scATAC or WGS library construction (**Fig. 2a**). This was meant to ensure  
105 similar representation of genetic subclones, which are usually regionally contiguous in this solid tumor, in  
106 both scATAC and WGS libraries. Second, we benchmarked Copy-scAT against CNV calls made using  
107 pediatric GBM (pGBM) surgical resections (n = 6 patient-matched diagnostic-relapse samples, 33,695 cells).  
108 In this case, scATAC and WGS libraries were generated from separate geographical regions of the same  
109 tumor (**Fig. 2b**). Third, we benchmarked Copy-scAT against CNV calls made with the single-cell CNV  
110 (scCNV) assay (10xGenomics) using multiple myeloma (MM) clinical samples (n = 10 samples, 31,266 cells).  
111 Overall, we observed that Copy-scAT correctly inferred all or most of the CNVs that were called with WGS  
112 (**Figs. 2a,b; Figs. S1, S2**) or scCNV data (**Fig. 2c; Fig S3**). In total, we profiled 51,571 cells from 20  
113 malignancies from 17 patients, and were able to infer CNV status for a total of 39,486 cells (**Table S1**). On  
114 average, we were able to call CNVs for 78.09% of cells in each sample (range: 29.16 – 91.22%) (**Table S1**).  
115 For chromosome-arm level CNV gains, sensitivity ranged from 0.51 for MM to 1.0 for aGBM and specificity  
116 ranged from 0.93 to 0.94 (**Table S2**). For chromosome arm-level losses, sensitivity ranged from 0.67 to 0.79  
117 and specificity from 0.89 to 0.95. The sensitivity and specificity of focal amplifications were very high  
118 (>0.975, **Table S2**). The variation observed may reflect technical differences between the strategies used for  
119 benchmarking. As expected, the calls of Copy-scAT for aGBM were the most accurate, likely because  
120 scATAC and WGS datasets were generated by relatively homogeneous starting material, as described above.  
121 Because of its design, it is also possible that Copy-scAT is more sensitive at inferring CNVs that occur in  
122 relatively rare subclones compared to WGS, potentially explaining (in addition to true false positives) why  
123 the number of CNVs inferred by our new tool is sometime higher than inferences made with WGS.  
124

## 125 scATAC data can be used to distinguish malignant from non-malignant cells

126 Tumor cells often harbor CNVs, and we reasoned that the use of Copy-scAT should enable the use of  
127 scATAC data to infer CNVs and therefore to distinguish between malignant and non-malignant cells. To  
128 test this hypothesis, we overlaid CNVs called by Copy-scAT onto scATAC datasets displayed in uniform  
129 manifold approximation and projections (UMAP) plots. This exercise led to the identification of cells that  
130 were clearly positive for multiple CNVs and others that appeared to have a normal genome. As an illustrative  
131 example, we found that the aGBM sample CGY4349 was composed of discrete cell populations that  
132 harbored focal amplifications at the *MDM4* (**Fig. 2d**), *PDGFRA* (**Fig. 2e**) and *EGFR* (**Fig. 2f**) loci, as well  
133 as chromosome 10p deletion (**Fig. 2g**) and chromosome 7 gain (**Fig. 2h,i**). Copy-scAT results suggest  
134 specific lineage relationships between subclones. For instance, chromosome 7 amplifications are clonal in  
135 this sample (**Fig. 2h,i**), whereas the chromosome 10 deletion is subclonal (**Fig. 2g**). In addition, our  
136 computational tool predicts that *PDGFRA* (**Fig. 2e**) and *EGFR* (**Fig. 2f**) focal amplifications are mutually  
137 exclusive, a phenomenon that has been reported in aGBM (13).  
138

139 Altogether, these results illustrate one specific population of cells (shaded green in **Fig. 2i**) that harbors  
140 several CNVs and are therefore putative cancer cells. At the same time, we also identified cells (labeled in  
141 dark blue in **Fig. 2i**) that did not appear to have any CNVs and are therefore likely to be cells from the tumor  
142 microenvironment. Equivalent results were obtained for pGBM (**Fig. S4**) and MM samples (**Fig. S5**). Since  
143 the latter appear as multiple scATAC clusters, it is possible that our strategy detects multiple distinct non-  
144 neoplastic cell clusters. Differential motif analysis with ChromVAR confirmed high scores for neural  
145 progenitor cell-associated motifs like NFIC and ASCL1 in CNV<sup>+</sup> cells (**Fig. 2j,k**), while the putative non-  
146 neoplastic clusters showed increased occupancy at transcription factor motifs associated with hematopoietic  
147 lineages, such as IKZF1 (**Fig. 2l**). Another CNV<sup>-</sup> cluster showed enrichment of FOXG1 binding motifs in  
148 accessible chromatin, in keeping with a non-neoplastic neural cell identity (**Fig. 2**). Using this approach, it

149 was possible to discriminate between malignant and cells from the tumor microenvironment in all tumor  
 150 samples analyzed (**Extended Figs. S6-S8**). Copy-scAT therefore effectively uses scATAC data to infer  
 151 CNVs, which can then be used to distinguish malignant from non-malignant cells and to infer lineage  
 152 relationships between genetic subclones that coexist in a tumor.  
 153

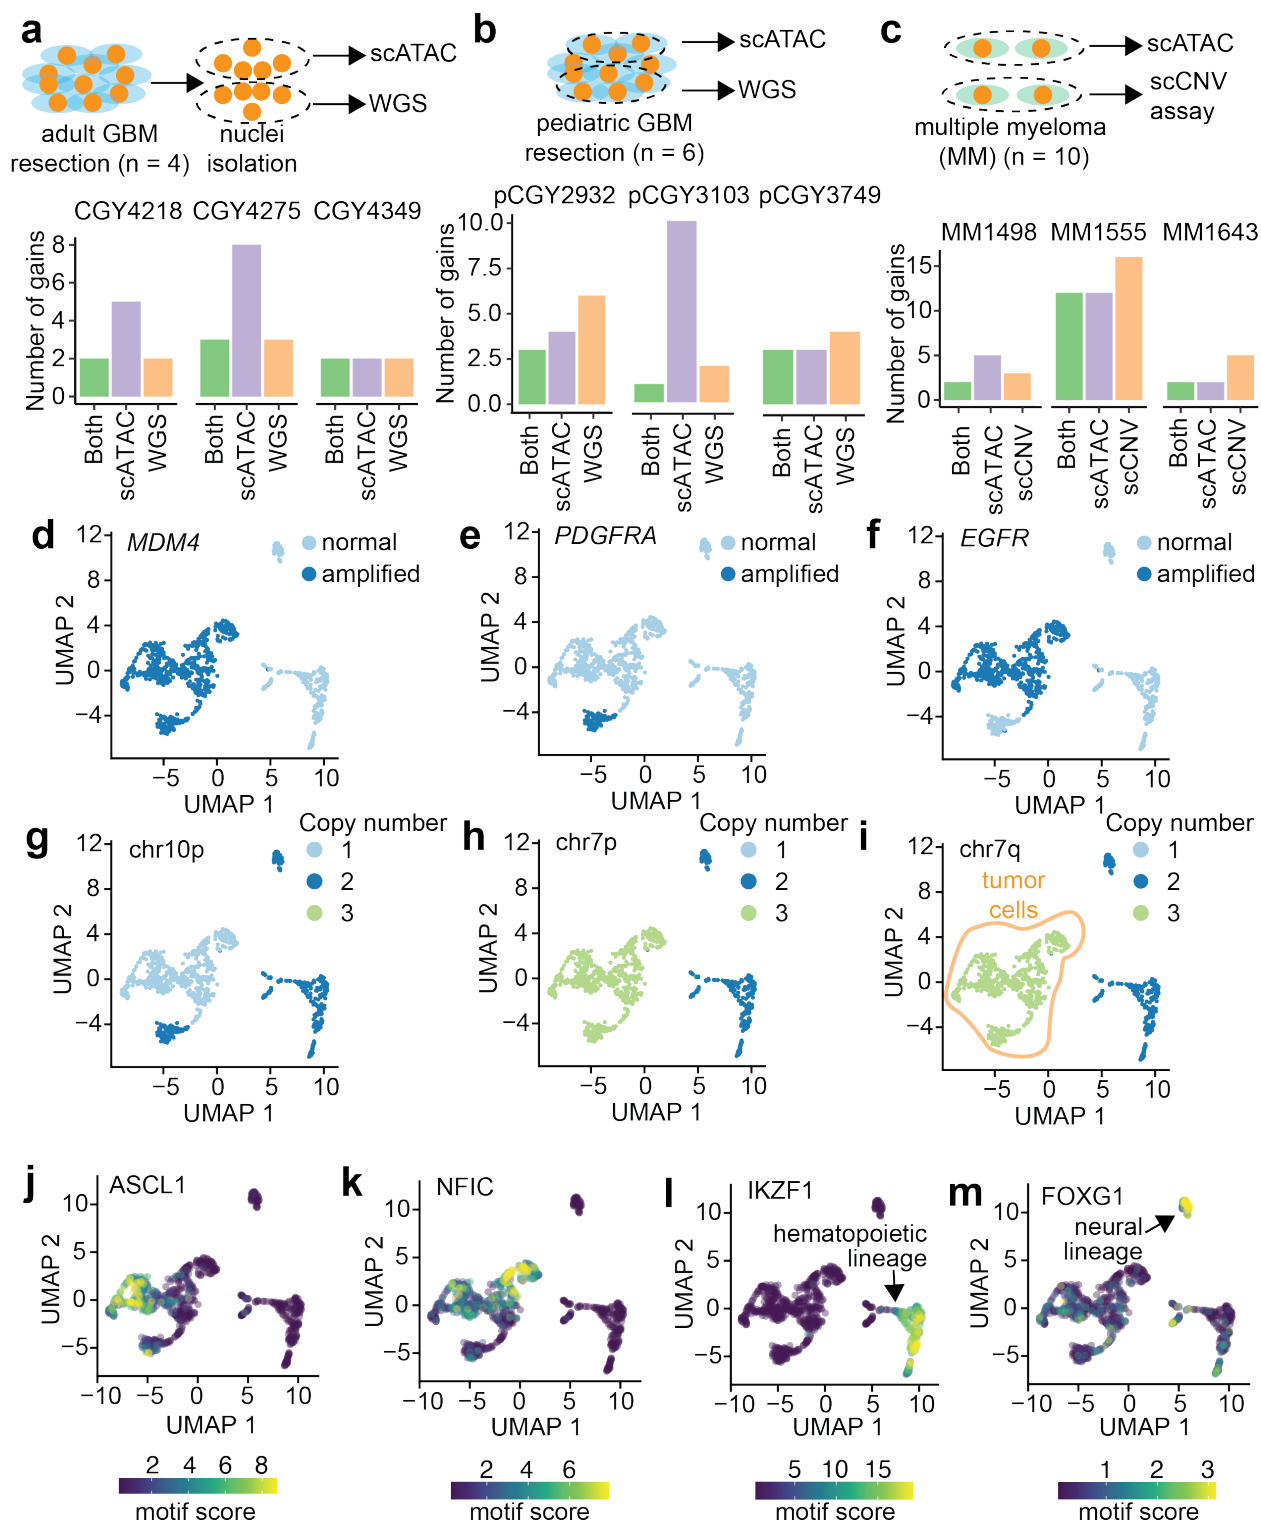

154  
 155  
 156  
 157

**Fig. 2. Benchmarking of Copy-scAT with three methods involving clinical samples from three distinct malignancies.**

- 158 (a) Banked frozen aGBM samples were used for both scATAC and WGS. Nuclei were isolated from the  
159 samples, mixed, and used for both scATAC and WGS. Number of chromosome-arm level gains detected in  
160 adult GBM samples identified using both methods, versus total numbers of gains detected by scATAC or  
161 WGS.
- 162 (b) Surgical pGBM resections were split, and one section was used for scATAC and the other for WGS.  
163 Number of chromosome-arm level gains detected in adult GBM samples identified using both methods,  
164 versus total numbers of gains detected by scATAC or WGS.
- 165 (c) Multiple myeloma samples were profiled by both scATAC and the single-cell CNV assay. Number of  
166 chromosome-arm level gains detected in adult GBM samples identified using both methods, versus total  
167 numbers of gains detected by scATAC or scCNV assay.
- 168 (d) *MDM4* amplification in an adult GBM sample (CGY4349). Amplified cells are coloured dark blue, and  
169 normal cells in pale blue.
- 170 (e) *PDGFRA* amplification in an adult GBM sample (CGY4349). Amplified cells are coloured dark blue,  
171 and normal cells in pale blue.
- 172 (f) *EGFR* amplification in an adult GBM sample (CGY4349). Amplified cells are coloured dark blue, and  
173 normal cells in pale blue.
- 174 (g) Chromosome 10p loss in an adult GBM sample.
- 175 (h) Chromosome 7P gain in an adult GBM sample.
- 176 (i) Chromosome 7Q gain in an adult GBM sample.
- 177 (j) ChromVAR activity score for *ASCL1*.
- 178 (k) ChromVAR activity score for *NFIC*.
- 179 (l) ChromVAR activity score for *IKZF1*.
- 180 (m) ChromVAR activity score for *FOXG1*.

## 181 182 183 184 **Subclonal genetics shapes chromatin accessibility profiles in aGBM**

185 We noticed that in most tumors we analyzed, cells harboring a given CNV had a tendency to cluster together  
186 (**Fig. 2d-i**). Individual clusters were in fact defined by the presence of specific CNVs (**Fig. 3a-c**). This was  
187 an unexpected observation, because it is widely assumed that clustering of scATAC data reflects the global  
188 patterns of chromatin accessibility. One possible explanation for this observation could be that chromosomal  
189 regions affected by a CNV display imbalances in the fragment depth distribution of scATAC datasets, and  
190 that these patterns have a dominant effect on cluster assignment. Most scATAC-seq workflows rely on some  
191 variant of term-frequency inverse document frequency (TF-IDF) normalization rather than feature scaling,  
192 and this may amplify the effects of CNV-driven DNA content imbalances. For instance, it is possible that  
193 focal amplifications of the *PDGFRA* locus result in increased frequency of transposition events that are  
194 mapped to this site. A dominant effect of chromatin accessibility at this amplified locus could result in  
195 *PDGFRA*-amplified cells clustering together in UMAP representations of scATAC data (**Fig 3d,e**). Indeed  
196 we found that compared to a random selection of peaks, the chromosomes which carried CNVs had  
197 significantly different numbers of peaks ranked as highly variant than chromosomes that did not have CNVs,  
198 leading to a markedly uneven distribution of top peaks ( $p < 2.2E-16$ ; Chi-squared test; **Fig. S9a**) This was  
199 not seen in non-neoplastic cells, which had relatively even top fragment distribution patterns ( $p = 0.05472$ ,  
200 Chi-squared test; **Fig. S9b**). To test this hypothesis, we used Copy-scAT to call CNVs in our tumor samples,  
201 then removed all peaks mapping to chromosomes predicted to harbor CNVs, and finally re-clustered all cells  
202 in each sample (**Fig. 3f**). We found that although removing chromosomes with CNVs from our analyses  
203 changed the overall cluster structure of a sample (**Fig. 3g**), *PDGFRA*-amplified cells still clustered close to  
204 each other (**Fig. 3h**). In fact, our results indicate that clustering after CNV removal is more granular but  
205 overall very stable (**Fig. 3i**). In this case, *PDGFRA*-amplified cells localized to a single cluster before  
206 removing chromosomes affected by CNVs. Following removal of CNV<sup>+</sup> chromosomes and re-clustering,  
207 most *PDGFRA*-amplified cells still clustered together, with only a few cells merging into a cluster that

208 included both amplified and non-amplified cells. Comparing the most variable peaks after chromosome  
 209 CNV removal showed a distribution closer to normal, supporting the marked effect of the CNVs on the  
 210 identification of variant peaks ( $p = 2.418E-8$ ; **Fig. S9c**). Contrary to current views of cancer epigenomics,  
 211 these data indicate that genetic subclones may have characteristic patterns of chromatin accessibility, and  
 212 that a cell's genetic background has significant influence on its likelihood of attaining specific epigenetic  
 213 states.  
 214

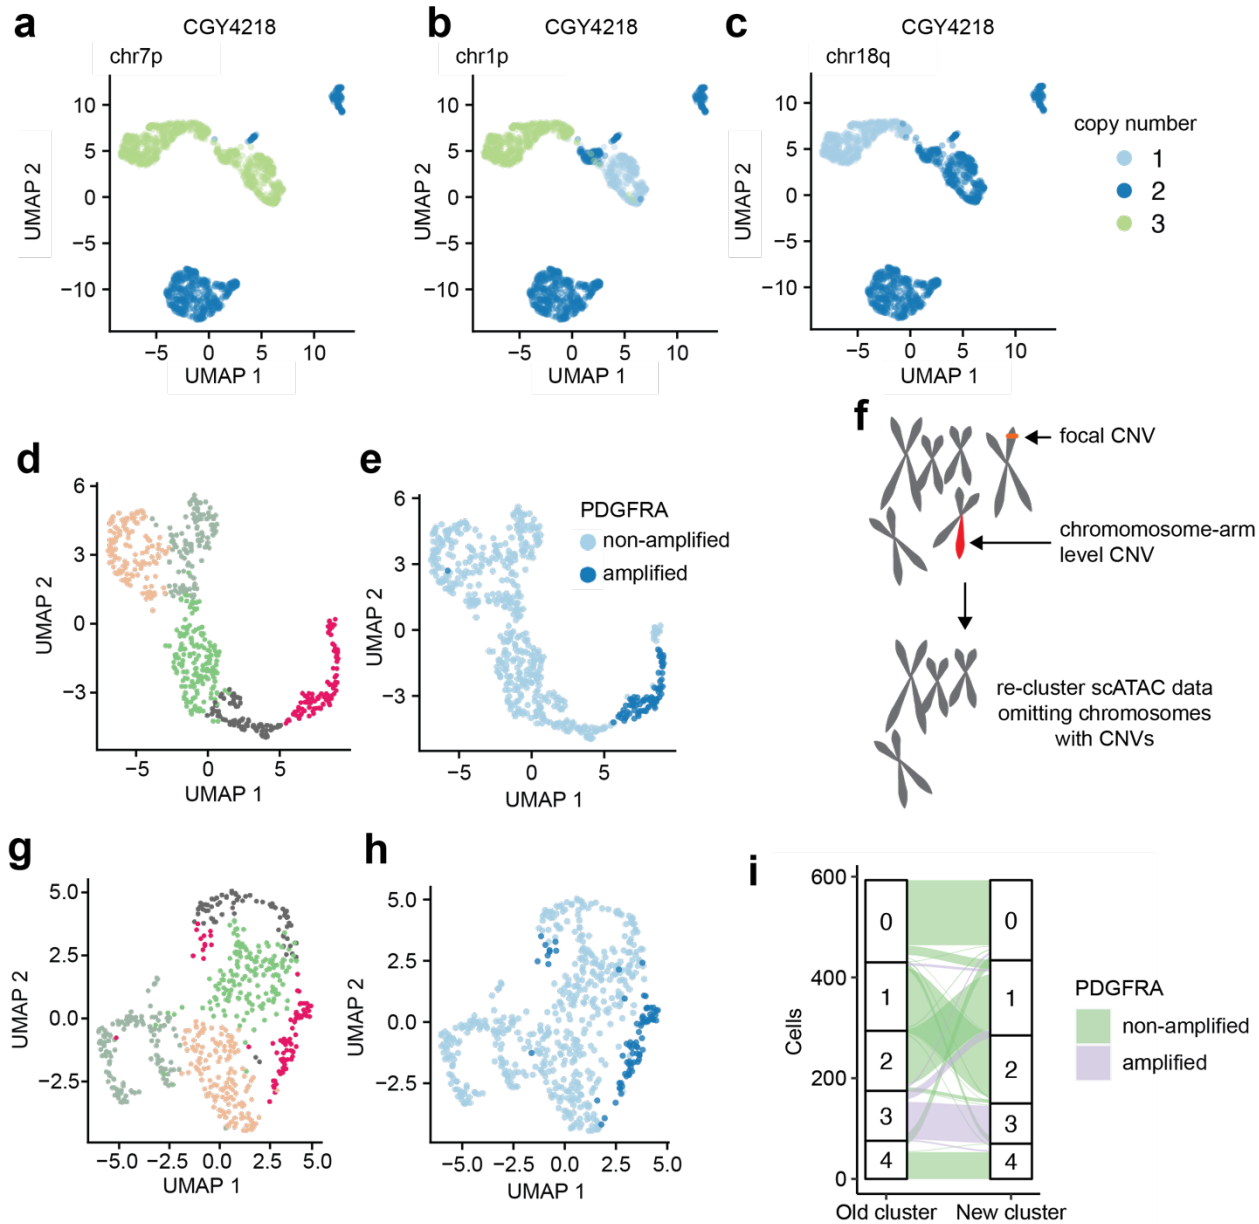

215  
 216 **Fig. 3. Subclonal genetics influences clustering of scATAC-seq data.**

217 (a-c) CNVs in adult GBM CGY4218 segregate within specific scATAC clusters.

218 (d, e) *PDGFRA*-amplified cells cluster together in adult GBM CGY4349.

219 (f) Diagram summarizing our strategy to remove CNVs from clustering of scATAC data. All chromosomes  
 220 or regions with putative CNVs were removed from downstream analyses, and cells were re-clustered.

221 (g) Reclustering of (d) following removal of chromosomes and regions affected by CNVs in CGY 4349.

222 (h) Distribution of *PDGFRA*-amplified cells following re-clustering.

223 (i) Cluster assignments of cells in CGY4349 (aGBM specimen) before and after removal of CNV-containing  
224 regions (purple: *PDGFR4*-amplified cells).

225  
226

### 227 Genetic events predispose subclones to the acquisition of developmental chromatin states

228 We further explored the notion that CNVs may shape chromatin accessibility profiles and its possible  
229 implications for cell fate determination. As an illustrative example, we focused on an aGBM sample  
230 (CGY4218) where CNVs at chromosome 1p characterized three genetic subclones, as determined with  
231 Copy-scAT: (i) A subclone with two copies of chromosome 1p; (ii) a subclone with loss of 1p; (iii) a subclone  
232 with gain of 1p (**Fig. 4a**).

233

234 We were interested in determining whether the major genetic subclones in this tumor had similar cycling  
235 properties. Unlike scRNA-seq, we found it is not possible to use scATAC profiles at cell cycle genes to  
236 determine whether a cell is proliferating. We reasoned that cells that are actively going through cell division  
237 have to replicate their DNA. Given that cancer cells have numerous CNVs on autosomes and could lead to  
238 noisy data, we decided to use Copy-scAT to identify cells that have doubled the number of their X  
239 chromosomes and defined them as actively cycling cells. To validate this approach, we determined the  
240 number of cells with double the number of expected X chromosomes – ie putative cycling cells – in  
241 previously published scATAC datasets for mouse brain and peripheral blood mononuclear cells (PBMCs).  
242 We hypothesized that we should be able to identify cycling cells in fetal mouse brain, but not in PBMCs. In  
243 fact, we detected numerous cycling cells (with twice the expected number of X chromosomes) in brain tissue  
244 but not in PBMCs (**Fig. S10**). This method detected putative cycling cells in our datasets (**Fig. 4b**). We used  
245 scATAC data to arrange cells from this tumor along pseudotime with the package STREAM (14) (**Fig. 4c**)  
246 and then superimposed cell cycle status determined with our X chromosome doubling method (**Fig. 4d**).  
247 The results show that cells along branch 2, which is strongly enriched for cells with chromosome 1p gains,  
248 are also the most proliferative (**Fig. 4e**), with over 25% of the cells actively going through replication ( $P =$   
249  $7.776 \times 10^{-14}$ ; Chi-square test). On the other hand, ~5% of cells along branch 1 and ~15% of cells along  
250 branch 3 were cycling. These data therefore indicate functional differences between cells with gain or loss of  
251 chromosome 1p.

252

253 We then used ChromVAR(15) and STREAM-ATAC to calculate scores for transcription factor (TF) binding  
254 motifs that are associated with neurodevelopmental processes. This analysis revealed that motifs bound by  
255 TFs that are associated with stem-like phenotypes, including OLIG2 and HOXA2, are enriched in accessible  
256 chromatin regions in cells that have one copy of chromosome 1p (**Fig. 4f**). Motifs bound by TFs associated  
257 with progenitor (**Fig. 4g**) and differentiated states (**Fig. 4h**) were enriched in the branch with more cells  
258 showing gain of chromosome 1p. This was associated with a significant shift in the overall distribution of  
259 enrichment of these motifs in cells along the different branches of the trajectory (**Fig. 4i-k**). A distribution  
260 of genetic subclones along developmental chromatin accessibility states was observed in other tumor samples  
261 we studied (**Fig. S11-S13**). Overall, the data support the notion that tumor cells sample a discrete number  
262 of chromatin states, but their transition probabilities differ based on genotype. Consequently, chromatin  
263 states associated with each genetic subclone manifest as different functional properties, here demonstrated  
264 at the level of cell proliferation and stemness profiles.

265

266



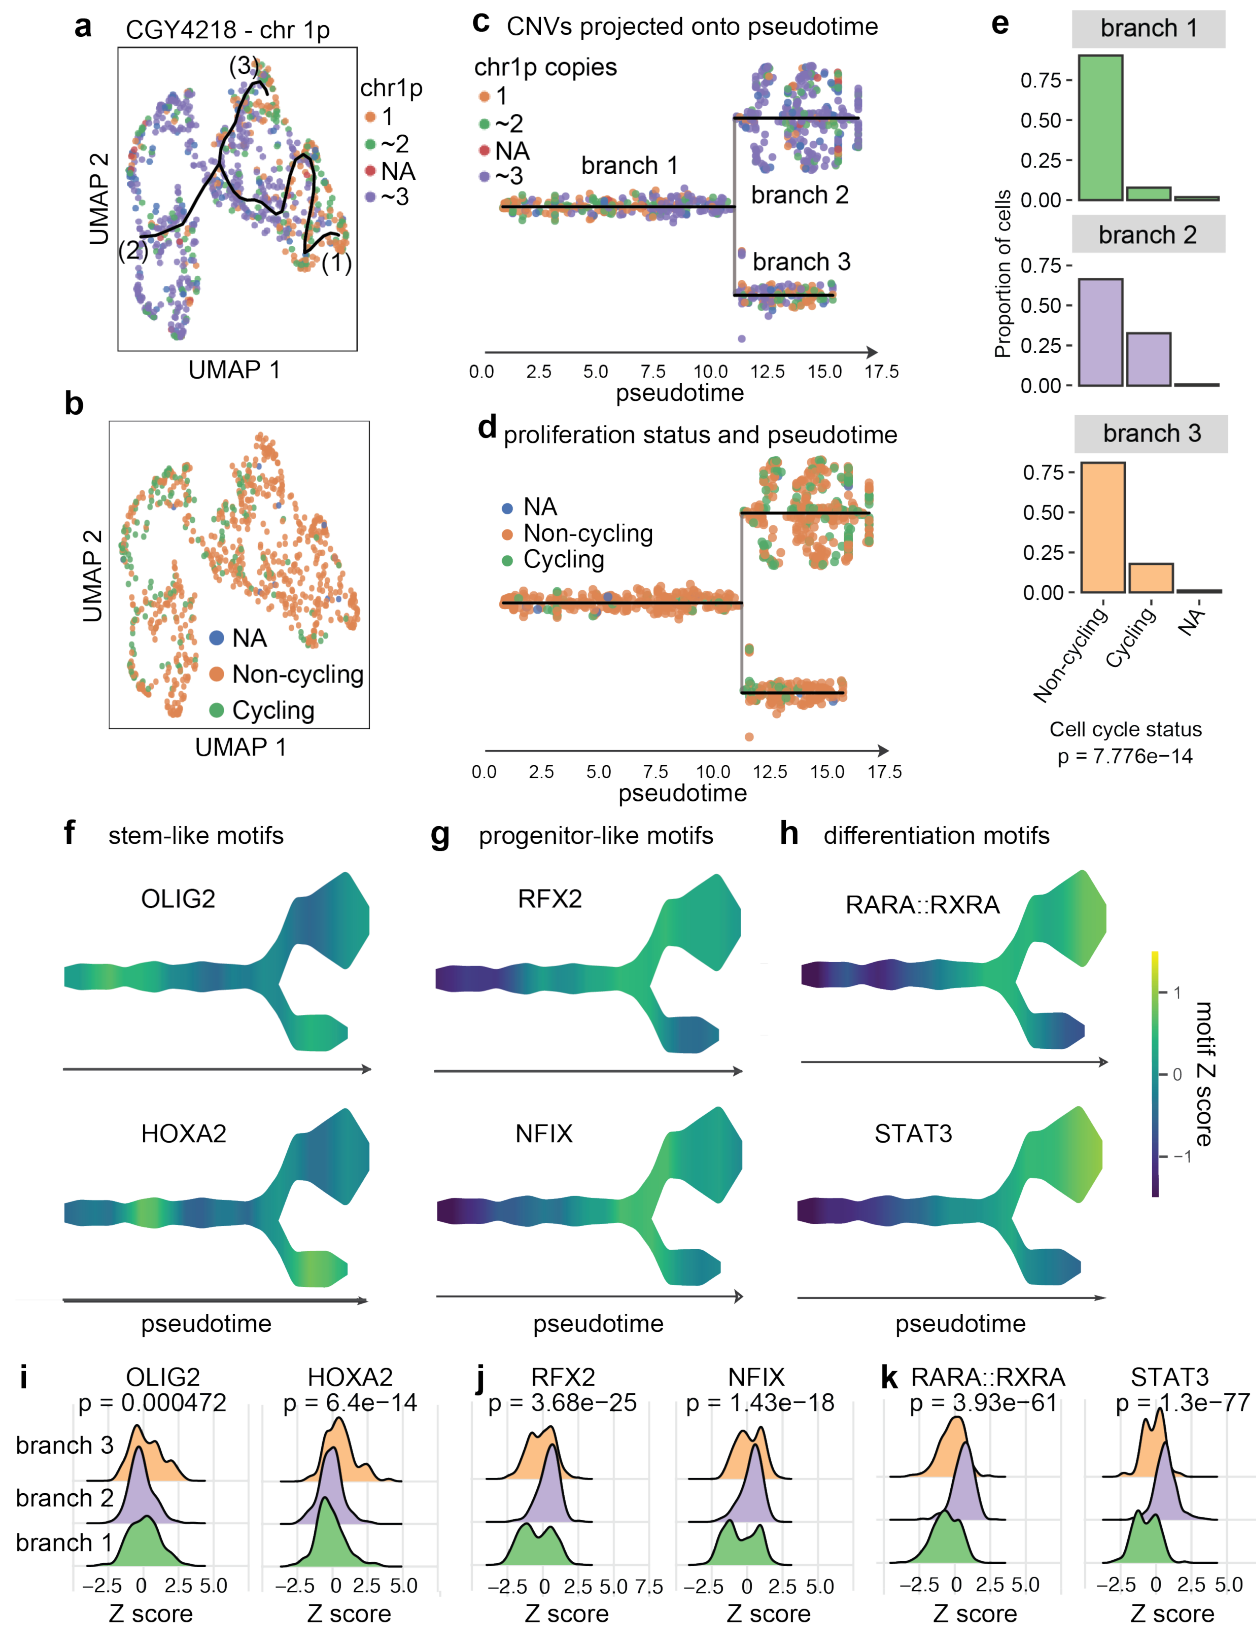

**Figure 4. Subclonal genetic alterations predispose cells to adopt developmental chromatin states.**

(a) Cells were clustered based on scATAC ChromVAR motif scores, then shaded based on the presence of 1, 2 or 3 copies of chromosome 1P.

(b) Cells were shaded based on their predicted cycling properties.

267  
268  
269  
270  
271

- 272 **(a)** Data shown in **(a)** projected onto pseudotime. The resulting three branches are populated preferentially  
273 by cells with gain or loss of chromosome 1P respectively.
- 274 **(d)** Proliferation status as shown in **(b)**, overlaid onto pseudotime.
- 275 **(e)** Branches enriched for 1P gain show greater proportions of proliferative cells (statistics: Chi-squared test).
- 276 **(f)** Scaled chromatin accessibility at binding motifs for OLIG2 and HOXA2, two TFs associated with  
277 stemness.
- 278 **(g)** Scaled chromatin accessibility at binding motifs for RFX2 and NFIX, two TFs associated with  
279 progenitor-like phenotypes.
- 280 **(h)** Scaled chromatin accessibility at binding motifs for RARA::RXRA and STAT3, two TFs associated with  
281 differentiated phenotypes.
- 282 **(i)** Enrichment plot for motif Z scores for OLIG2 and HOXA2.
- 283 **(j)** Enrichment plot for motif Z scores for RFX and NFIX.
- 284 **(k)** Enrichment plot for motif Z scores for RARA::RXRA and STAT3. P values calculated by Kruskal-Wallis  
285 test.
- 286

## 287 **DISCUSSION**

288 Here we describe Copy-scAT, the first computational tool dedicated to inferring CNVs using scATAC data.  
289 Copy-scAT resolves a computational bottleneck that has restricted the application of single-cell epigenomic  
290 techniques to the study of clinical tumor samples, which are often mixtures of malignant and non-malignant  
291 cells. The presence of non-malignant cells can severely confound the analyses of these samples and  
292 downstream data interpretation. Cell admixture is a particular problem for scATAC data because of the  
293 inherent sparsity of these datasets and because they do not provide direct information on the expression  
294 status of cell lineage markers that could be used to solve cellular identities. Because most tumor types harbor  
295 CNVs, Copy-scAT provides a simple way of solving this problem.

296 It is important to note that Copy-scAT enables users to perform analyses on both malignant and non-  
297 malignant cells from a tumor sample, because cell barcodes associated with both presence or absence of  
298 CNVs can be selected for downstream analyses. Implementation of Copy-scAT will therefore be beneficial  
299 to groups interested in defining the epigenomes of both tumor cells and their microenvironment. Because  
300 chromatin accessibility datasets provide information on mechanisms of transcriptional regulation by distal  
301 and proximal enhancer and super enhancer elements, Copy-scAT could be useful in clarifying epigenetic  
302 mechanisms involved in immune suppression and T cell exhaustion, for instance. Copy-scAT also allows  
303 scATAC studies of frozen banked cancer specimens (see Methods), because it requires no prior knowledge  
304 of cell composition.

305 We show that the underlying CNV architecture plays a significant role in clustering of scATAC data, a  
306 problem that is amplified by the use of TF-IDF algorithms for normalization. These effects are less  
307 pronounced when clustering is based on motif activity scores (e.g. ChromVAR), likely as this incorporates  
308 data from multiple chromosomes, thus dampening the effect of variation at any one specific locus. Further  
309 studies are needed to identify the optimal way to address the effects of CNVs in downstream analyses, as  
310 they may present a significant confounder and potentially mask significant biological relationships.

311 In this report, we provide evidence that Copy-scAT can be used to shed new light on how genetics and  
312 epigenetics interface in cancer. We show that genetic subclones tend to have unique chromatin accessibility  
313 landscapes that can promote or antagonize stem-like phenotypes. Consequently, we report that some genetic  
314 subclones have greater proportions of stem-like cells, and others appear more differentiated. These results  
315 offer a radically different view of functional hierarchies in GBM, where stem-like properties were thought to  
316 be programmed by epigenetic factors, independently of genotype. These findings provide a simple  
317 explanation for the observed intra-tumoral transcriptional heterogeneity in GBM ((5, 16)), by suggesting that  
318 each genetic subclone achieves specific chromatin accessibility profiles, which in turn result in subclone-  
319 specific transcriptional outcomes.

320 Copy-scAT will enable future studies of subclonal chromatin dynamics in complex tumor types and may be  
321 an important tool in better understanding the functional relationships between subclones, their  
322 microenvironment and therapy response.

323  
324

## 325 **MATERIALS AND METHODS**

326

### 327 **Ethics and consent statement**

328 All samples were collected and used for research with appropriate informed consent and with approval by  
329 the Health Research Ethics Board of Alberta.

330

### 331 **scATAC-seq sample processing**

332 GBM samples were either frozen surgical resections (pediatric GBM) or cells dissociated from fresh surgical  
333 specimens and cryopreserved (adult GBM). Samples were dissociated in a 1.5 mL microcentrifuge tube, using  
334 a wide-bore P1000 pipette followed by a narrow bore P1000 pipette in nuclear resuspension buffer (10 mM  
335 Tris-HCl; 10 mM NaCl; 3 mM MgCl<sub>2</sub>; 0.1% IGEPAL, 0.1% Tween-20, 0.01% Digitonin, 1% BSA in PBS),  
336 then vortexed briefly, chilled on ice for 10 minutes, then pipetted again, and spun at 4°C, 500 g for 5 minutes.  
337 This step was repeated, and the sample was then resuspended in Tween wash buffer (10 mM Tris-HCl; 10  
338 mM NaCl; 3 mM MgCl<sub>2</sub>; 0.1% IGEPAL, 0.1% Tween-20; 1% BSA in PBS), then strained through a 35 µm  
339 cell strainer FACS tube (Fisher Scientific 08-771-23) to remove debris. Nuclei were then quantified by trypan  
340 blue on the Countess II (Invitrogen), spun down at 500 g at 4°C for 5 minutes, resuspended in the nuclear  
341 isolation buffer (10X Genomics), and the rest of the scATAC was performed as per the 10X Genomics  
342 protocol. MM samples were from bone marrow aspirates collected from patients; tumor cells were isolated  
343 from mononuclear cell fractions through Ficoll gradients coupled with magnetic bead sorting of CD138<sup>+</sup>  
344 cells. scATAC libraries were prepared from GBM and MM samples using a Chromium controller  
345 (10xGenomics). Libraries were sequenced on NextSeq 500 or Novaseq 6000 instruments (Illumina) at the  
346 Centre for Health Genomics and Informatics (CHGI; University of Calgary) using the recommended  
347 settings.

348

#### 349 **scATAC-seq initial data analysis**

350 The raw sequencing data was demultiplexed using cellranger-atac mkfastq (Cell Ranger ATAC, version 1.1.0,  
351 10x Genomics). Single cell ATAC-seq reads were aligned to the hg38 reference genome (GRCh38, version  
352 1.1.0, 10x Genomics) and quantified using cellranger-atac count function with default parameters (Cell  
353 Ranger ATAC, version 1.1.0, 10x Genomics).

354

#### 355 **Single-cell CNV analysis**

##### 356 *Fragment pileup and normalization*

357 The fragment file was processed and signal was binned into bins of a preset size (default 1 Mb) across the  
358 hg38 chromosomes to generate a genome-wide read-depth map. Only barcodes with a minimum of 5000  
359 reads were retained, in order to remove spurious barcodes. This flattened barcode-fragment matrix pileup  
360 was cleaned by removal of genomic intervals which were uninformative (greater than 80% zeros) and  
361 barcodes with greater than a certain number of zero intervals. Cells passing this first filter were normalized  
362 with counts-per-million normalization using *cpm* in the *edgeR* package (17).

363

##### 364 *Chromosome arm CNV analysis*

365 The normalized barcode-fragment matrix was collapsed to the chromosome arm level, using chromosome  
366 arm information from the UCSC (UCSC table: cytoBand), centromeres were removed, and signal in each  
367 bin was normalized using the number of basepairs in CpG islands in the interval using the UCSC CpG islands  
368 table (UCSC table: cpgIslandExtUnmasked). The signal was then summarized using a quantile-trimmed-  
369 mean (between the 50<sup>th</sup> and 80<sup>th</sup> quantiles). Only chromosome arms with a minimum trimmed mean signal  
370 were kept for analysis.

371 The chromosome arm signal matrix is mixed with a generated set proportion of pseudodiploid control cells,  
372 defined using the mean of chromosome segment medians with a defined standard deviation. This cell-signal  
373 matrix is then scaled across each chromosome arm and centered on the median signal of all chromosomes.  
374 Each chromosome arm segment is then analyzed using Gaussian decomposition with Mclust (18). The  
375 subsequent clusters are filtered based on Z scores and mixing proportions, and redundant clusters are  
376 combined. These Z scores are then translated into estimated copy numbers for each segment for each

377 barcode. The barcode CNV assignments can be optionally used to assign consensus CNVs to clusters  
378 generated in other software packages such as Loupe or Seurat/Signac.

379

### 380 *Detection of amplifications*

381 The normalized barcode-fragment matrix was scaled and mean-variance changepoint analysis using the  
382 Changepoint package was performed for each cell and each chromosome to identify areas of abnormally  
383 high signal ( $Z$  score greater than 5) (19). The consensus coordinates of each amplification region were  
384 generated across all cells and only abnormalities affecting a minimum number of cells were kept for analysis.

385

### 386 *Detection of loss of heterozygosity*

387 The normalized barcode-fragment matrix was scaled as above. As overall coverage levels in these samples  
388 are quite sparse, a chromosome-wide coverage profile was generated for the entire sample in bulk, using the  
389 30% quantile as a cut-off, and then changepoint analysis was used to find inflection points. This was followed  
390 by Gaussian decomposition of the values using Mclust to identify putative areas of loss or gain, thresholded  
391 by a minimum difference in signal between the clusters identified by Mclust.

392

### 393 **scATAC trajectory analysis**

394 STREAM-ATAC and STREAM (20) were used to generate pseudotime trajectories based on motif  
395 occupancy profiles generated using ChromVAR (21) with the JASPAR 2018 motif database as reference (22).  
396 Dimensionality reduction was performed using the top 20 components and 50 neighbours, and an initial  
397 elastic graph was generated on the 2D UMAP projection using 10 clusters, using the kmeans method with  
398  $n\_neighbours = 30$ . An elastic principal graph was constructed using the parameters  $epg\_alpha = 0.02$ ,  
399  $epg\_mu = 0.05$ ,  $epg\_lambda = 0.02$  and  $epg\_trimmingradius = 1.2$ , with branch extension using  
400 ‘QuantDists’. Trees were rooted using the branch with highest motif activities for OLIG2 and ETV motifs  
401 as root.

402

### 403 **Whole genome sequencing**

404 DNA was extracted from residual nuclei from the same samples and tissue fragments used for scATAC-seq  
405 of adult GBM samples, using the Qiagen DNEasy Blood and Tissue DNA extraction kit (Qiagen # 69504).  
406 Libraries were prepared using the NEBNext Ultra II DNA Library Prep Kit (#E7645) and sequenced on  
407 the Novaseq 6000 (Illumina) at the CHGI (University of Calgary), in paired-end mode.

408

### 409 **Whole genome data processing**

410 Genome data was aligned to the hg38 assembly using bwa mem (bwa 0.7.17)(23). Samtools was used to  
411 extract high-quality reads ( $Q > 30$ ) and picard tools (Broad Institute) was used to remove duplicates (24).

412

### 413 **Whole genome SNV and CNV detection**

414 Gatk mutect2 (Broad Institute) was run on the filtered data to detect SNVs with low stringency using the  
415 following settings: `--disable-read-filter MateOnSameContigOrNoMappedMateReadFilter`. CNVkit was subsequently  
416 used to call copy number variants using the following parameters: `--filter cn -m clonal -purity 0.7` (25). Adjacent  
417 segments were further combined and averaged using bedtools (26).

## 418 Data visualization and clustering

419 Data was visualized and UMAP plots were generated using Seurat 3.0.0 and Signac 1.0.0 (27) and Cell Loupe  
420 version 4.0.0 (28).

421

## 422 Statistical analysis

423 Between-group differences in discrete values (e.g. chromosome peaks, branch assignments) were calculated  
424 using the Chi-squared test. Differences in non-parametric distributions (motif accessibility in clusters) were  
425 quantified using the Kruskal-Wallis test.

426

427

## 428 References

- 429 1. B. Lim, Y. Lin, N. Navin, Advancing Cancer Research and Medicine with Single-Cell Genomics.  
430 *Cancer Cell.* **37**, 456–470 (2020).
- 431 2. A. P. Patel, I. Tirosh, J. J. Trombetta, A. K. Shalek, S. M. Gillespie, H. Wakimoto, D. P. Cahill, B. V.  
432 Nahed, W. T. Curry, R. L. Martuza, D. N. Louis, O. Rozenblatt-Rosen, M. L. Suvà, A. Regev, B. E.  
433 Bernstein, Single-cell RNA-seq highlights intratumoral heterogeneity in primary glioblastoma. *Science*  
434 *(80- )*. (2014), doi:10.1126/science.1254257.
- 435 3. S. Darmanis, S. A. Sloan, D. Croote, M. Mignardi, S. Chernikova, P. Samghababi, Y. Zhang, N.  
436 Neff, M. Kowarsky, C. Caneda, G. Li, S. D. Chang, I. D. Connolly, Y. Li, B. A. Barres, M. H.  
437 Gephart, S. R. Quake, Single-Cell RNA-Seq Analysis of Infiltrating Neoplastic Cells at the Migrating  
438 Front of Human Glioblastoma. *Cell Rep.*, 1399–1410 (2017).
- 439 4. J. Gojo, B. Englinger, L. Jiang, J. M. Hübner, M. L. Shaw, O. A. Hack, S. Madlener, D. Kirchhofer,  
440 I. Liu, J. Pyrdol, V. Hovestadt, E. Mazzola, N. D. Mathewson, M. Trissal, D. Lötsch, C. Dorfer, C.  
441 Haberler, A. Halfmann, L. Mayr, A. Peyrl, R. Geyeregger, B. Schwalm, M. Mauermann, K. W.  
442 Pajtler, T. Milde, M. E. Shore, J. E. Geduldig, K. Pelton, T. Czech, O. Ashenberg, K. W.  
443 Wucherpennig, O. Rozenblatt-Rosen, S. Alexandrescu, K. L. Ligon, S. M. Pfister, A. Regev, I.  
444 Slavc, W. Berger, M. L. Suvà, M. Kool, M. G. Filbin, Single-Cell RNA-Seq Reveals Cellular  
445 Hierarchies and Impaired Developmental Trajectories in Pediatric Ependymoma. *Cancer Cell.* **38**,  
446 44–59 (2020).
- 447 5. C. Neftel, J. Laffy, M. G. Filbin, T. Hara, M. E. Shore, G. J. Rahme, A. R. Richman, D. Silverbush,  
448 M. L. Shaw, C. M. Hebert, J. Dewitt, S. Gritsch, E. M. Perez, L. N. Gonzalez Castro, X. Lan, N.  
449 Druck, C. Rodman, D. Dionne, A. Kaplan, M. S. Bertalan, J. Small, K. Pelton, S. Becker, D. Bonal,  
450 Q.-D. Nguyen, R. L. Servis, J. M. Fung, R. Mylvaganam, L. Mayr, J. Gojo, C. Haberler, R.  
451 Geyeregger, T. Czech, I. Slavc, B. V. Nahed, W. T. Curry, B. S. Carter, H. Wakimoto, P. K.  
452 Brastianos, T. T. Batchelor, A. Stemmer-Rachamimov, M. Martinez-Lage, M. P. Frosch, I.  
453 Stamenkovic, N. Riggi, E. Rheinbay, M. Monje, O. Rozenblatt-Rosen, D. P. Cahill, A. P. Patel, T.  
454 Hunter, I. M. Verma, K. L. Ligon, D. N. Louis, A. Regev, B. E. Bernstein, I. Tirosh, M. L. Suvà, An  
455 Integrative Model of Cellular States, Plasticity, and Genetics for Glioblastoma. *Cell.* **178**, 835-849.e21  
456 (2019).
- 457 6. M. C. Vladoiu, I. El-Hamamy, L. K. Donovan, H. Farooq, B. L. Holgado, Y. Sundaravadanam, V.  
458 Ramaswamy, L. D. Hendrikse, S. Kumar, S. C. Mack, J. J. Y. Lee, V. Fong, K. Juraschka, D.  
459 Przelicki, A. Michealraj, P. Skowron, B. Luu, H. Suzuki, A. S. Morrissy, F. M. G. Cavalli, L. Garzia,  
460 C. Daniels, X. Wu, M. A. Qazi, S. K. Singh, J. A. Chan, M. A. Marra, D. Malkin, P. Dirks, L. Heisler,  
461 T. Pugh, K. Ng, F. Notta, E. M. Thompson, C. L. Kleinman, A. L. Joyner, N. Jabado, L. Stein, M.  
462 D. Taylor, Childhood cerebellar tumours mirror conserved fetal transcriptional programs. *Nature.*

- 463            572, 67–73 (2019).
- 464 7. I. Tirosh, A. S. Venteicher, C. Hebert, L. E. Escalante, A. P. Patel, K. Yizhak, J. M. Fisher, C.  
465 Rodman, C. Mount, M. G. Filbin, C. Neftel, N. Desai, J. Nyman, B. Izar, C. C. Luo, J. M. Francis,  
466 A. A. Patel, M. L. Onozato, N. Riggi, K. J. Livak, D. Gennert, R. Satija, B. V. Nahed, W. T. Curry,  
467 R. L. Martuza, R. Mylvaganam, A. J. Iafrate, M. P. Frosch, T. R. Golub, M. N. Rivera, G. Getz, O.  
468 Rozenblatt-Rosen, D. P. Cahill, M. Monje, B. E. Bernstein, D. N. Louis, A. Regev, M. L. Suvà,  
469 Single-cell RNA-seq supports a developmental hierarchy in human oligodendroglioma. *Nature*. **539**,  
470 309–313 (2016).
- 471 8. A. S. Venteicher, I. Tirosh, C. Hebert, K. Yizhak, C. Neftel, M. G. Filbin, V. Hovestadt, L. E.  
472 Escalante, M. L. Shaw, C. Rodman, S. M. Gillespie, D. Dionne, C. C. Luo, H. Ravichandran, R.  
473 Mylvaganam, C. Mount, M. L. Onozato, B. V. Nahed, H. Wakimoto, W. T. Curry, A. J. Iafrate, M.  
474 N. Rivera, M. P. Frosch, T. R. Golub, P. K. Brastianos, G. Getz, A. P. Patel, M. Monje, D. P. Cahill,  
475 O. Rozenblatt-Rosen, D. N. Louis, B. E. Bernstein, A. Regev, M. L. Suvà, Decoupling genetics,  
476 lineages, and microenvironment in IDH-mutant gliomas by single-cell RNA-seq. *Science (80-. )*. **355**  
477 (2017), doi:10.1126/science.aai8478.
- 478 9. S. Müller, A. Cho, S. J. Liu, D. A. Lim, A. Diaz, CONICS integrates scRNA-seq with DNA  
479 sequencing to map gene expression to tumor sub-clones. *Bioinformatics* (2018),  
480 doi:10.1093/bioinformatics/bty316.
- 481 10. J. D. Buenrostro, P. G. Giresi, L. C. Zaba, H. Y. Chang, W. J. Greenleaf, Transposition of native  
482 chromatin for fast and sensitive epigenomic profiling of open chromatin, DNA-binding proteins  
483 and nucleosome position. *Nat. Methods* (2013), doi:10.1038/nmeth.2688.
- 484 11. J. D. Buenrostro, B. Wu, U. M. Litzenburger, D. Ruff, M. L. Gonzales, M. P. Snyder, H. Y. Chang,  
485 W. J. Greenleaf, Single-cell chromatin accessibility reveals principles of regulatory variation. *Nature*  
486 (2015), doi:10.1038/nature14590.
- 487 12. R. Killick, I. A. Eckley, Changepoint: An R package for changepoint analysis. *J. Stat. Softw.* (2014),  
488 doi:10.18637/jss.v058.i03.
- 489 13. M. Snuderl, L. Fazlollahi, L. P. Le, M. Nitta, B. H. Zhelyazkova, C. J. Davidson, S. Akhavanfard, D.  
490 P. Cahill, K. D. Aldape, R. A. Betensky, D. N. Louis, A. J. Iafrate, Mosaic amplification of multiple  
491 receptor tyrosine kinase genes in glioblastoma. *Cancer Cell* (2011), doi:10.1016/j.ccr.2011.11.005.
- 492 14. H. Chen, L. Albergante, J. Y. Hsu, C. A. Lareau, G. Lo Bosco, J. Guan, S. Zhou, A. N. Gorban, D.  
493 E. Bauer, M. J. Aryee, D. M. Langenau, A. Zinovyev, J. D. Buenrostro, G. C. Yuan, L. Pinello,  
494 Single-cell trajectories reconstruction, exploration and mapping of omics data with STREAM. *Nat.*  
495 *Commun.* **10**, 1903 (2019).
- 496 15. A. N. Schep, B. Wu, J. D. Buenrostro, W. J. Greenleaf, ChromVAR: Inferring transcription-factor-  
497 associated accessibility from single-cell epigenomic data. *Nat. Methods*. **14**, pages975–978 (2017).
- 498 16. A. P. Patel, I. Tirosh, J. J. Trombetta, A. K. Shalek, S. M. Gillespie, H. Wakimoto, D. P. Cahill, B. V.  
499 Nahed, W. T. Curry, R. L. Martuza, D. N. Louis, O. Rozenblatt-Rosen, M. L. Suvà, A. Regev, B. E.  
500 Bernstein, Single-cell RNA-seq highlights intratumoral heterogeneity in primary glioblastoma. *Science*.  
501 **344**, 1396–1401 (2014).
- 502 17. M. D. Robinson, D. J. McCarthy, G. K. Smyth, edgeR: A Bioconductor package for differential  
503 expression analysis of digital gene expression data. *Bioinformatics*. **26**, 139–140 (2010).
- 504 18. L. Scrucca, M. Fop, T. B. Murphy, A. E. Raftery, Mclust 5: Clustering, classification and density  
505 estimation using Gaussian finite mixture models. *R J.* **8**, 289–317 (2016).
- 506 19. R. Killick, I. A. Eckley, Changepoint: An R package for changepoint analysis. *J. Stat. Softw.* **58**

- 507 (2014), doi:10.18637/jss.v058.i03.
- 508 20. H. Chen, L. Albergante, J. Y. Hsu, C. A. Lareau, G. Lo Bosco, J. Guan, S. Zhou, A. N. Gorban, D.  
509 E. Bauer, M. J. Aryee, D. M. Langenau, A. Zinovyev, J. D. Buenrostro, G. C. Yuan, L. Pinello,  
510 Single-cell trajectories reconstruction, exploration and mapping of omics data with STREAM. *Nat.*  
511 *Commun.* (2019), doi:10.1038/s41467-019-09670-4.
- 512 21. A. N. Schep, B. Wu, J. D. Buenrostro, W. J. Greenleaf, ChromVAR: Inferring transcription-factor-  
513 associated accessibility from single-cell epigenomic data. *Nat. Methods* (2017),  
514 doi:10.1038/nmeth.4401.
- 515 22. A. Khan, O. Fornes, A. Stigliani, M. Gheorghe, J. A. Castro-Mondragon, R. Van Der Lee, A. Bessy,  
516 J. Chèneby, S. R. Kulkarni, G. Tan, D. Baranasic, D. J. Arenillas, A. Sandelin, K. Vandepoele, B.  
517 Lenhard, B. Ballester, W. W. Wasserman, F. Parcy, A. Mathelier, JASPAR 2018: Update of the  
518 open-access database of transcription factor binding profiles and its web framework. *Nucleic Acids*  
519 *Res.* (2018), doi:10.1093/nar/gkx1126.
- 520 23. H. Li, R. Durbin, Fast and accurate short read alignment with Burrows-Wheeler transform.  
521 *Bioinformatics.* **25**, 1754–60 (2009).
- 522 24. H. Li, B. Handsaker, A. Wysoker, T. Fennell, J. Ruan, N. Homer, G. Marth, G. Abecasis, R. Durbin,  
523 The Sequence Alignment/Map format and SAMtools. *Bioinformatics.* **25**, 2078–2079 (2009).
- 524 25. E. Talevich, A. H. Shain, T. Botton, B. C. Bastian, CNVkit: Genome-Wide Copy Number Detection  
525 and Visualization from Targeted DNA Sequencing. *PLoS Comput. Biol.* **12** (2016),  
526 doi:10.1371/journal.pcbi.1004873.
- 527 26. A. R. Quinlan, I. M. Hall, BEDTools: A flexible suite of utilities for comparing genomic features.  
528 *Bioinformatics.* **26**, 841–2 (2010).
- 529 27. T. Stuart, A. Srivastava, C. Lareau, R. Satija, *bioRxiv*, in press, doi:10.1101/2020.11.09.373613.
- 530 28. A. Butler, P. Hoffman, P. Smibert, E. Papalexi, R. Satija, Integrating single-cell transcriptomic data  
531 across different conditions, technologies, and species. *Nat. Biotechnol.* **36**, 411–420 (2018).

532  
533  
534

## ACKNOWLEDGMENTS

535 **Funding:** A Canada Research Chair in Brain Cancer Epigenomics (tier 2) from the Government of Canada,  
536 Project grants from the Canadian Institutes of Health Research (CIHR; PJT-156278, PJT-173475), a  
537 Discovery grant from the Natural Sciences and Engineering Research Council (NSERC) and an Azrieli  
538 Future Leader in Canadian Brain Research grant to MG; a Clinician Investigator Program fellowship from  
539 Alberta Health Services and a fellowship from Alberta Innovates to AN; an Eyes High Scholarship from the  
540 University of Calgary to DS; a Clark Smith postdoctoral fellowship and a CIHR postdoctoral fellowship to  
541 MJ; a Canada Research Char in Precision Oncology (tier 2) and a CIHR grant (PJT-438802) to SM; an Alberta  
542 Graduate Excellence Scholarship and Alberta Innovates scholarship to AG. This project has been made  
543 possible by the Brain Canada Foundation through the Canada Brain Research Fund, with the financial  
544 support of Health Canada and the Azrieli Foundation.

545

546 **Author contributions:** Conception and experimental design: AN, MG. Generation of datasets: AN, KE,  
547 JC, PN, NB. Data acquisition and analysis: AN, DS, MJ, AG, SM, NB, MG. Data interpretation and creation  
548 of new software: AN, MG. Manuscript preparation: All co-authors.

549

550 **Competing interests:** The authors declare no competing interests.



551

552 **Data and materials availability:** The Copy-scAT package and a sample tutorial are available on Github at  
553 <http://github.com/spcdot/CopyscAT>. All datasets will be made available upon publication in a peer  
554 reviewed journal.

555

556

557

558

559

560

561

562

563

564

565

566

567

568

569

570

571

572

573

574

575

576

577

578

579

580

581

582

583

584

585

586

587

588

589

590

591

592

593

594

595

596

597

598

599

600 **SUPPLEMENTAL MATERIAL**

601  
602  
603  
604

**Table S1. Summary of samples and cells profiled by Copy-scAT**

| <b>Sample</b>               | <b>Unique barcodes after pileup</b> | <b>Unique barcodes after filtering</b> | <b>Percent passing filters</b> |
|-----------------------------|-------------------------------------|----------------------------------------|--------------------------------|
| CGY4218                     | 1542                                | 1335                                   | 86.58%                         |
| CGY4250                     | 1371                                | 947                                    | 69.07%                         |
| CGY4275                     | 1004                                | 609                                    | 60.66%                         |
| CGY4349                     | 961                                 | 756                                    | 78.67%                         |
| pCGY2932                    | 1203                                | 802                                    | 66.67%                         |
| pCGY2937                    | 1445                                | 1200                                   | 83.04%                         |
| pCGY3103                    | 2189                                | 956                                    | 43.67%                         |
| pCGY3402                    | 3162                                | 2318                                   | 73.31%                         |
| pCGY3749                    | 2774                                | 2503                                   | 90.23%                         |
| pCGY4021                    | 1963                                | 1382                                   | 70.40%                         |
| MM1217                      | 890                                 | 792                                    | 88.99%                         |
| MM1388                      | 2538                                | 2219                                   | 87.43%                         |
| MM1389                      | 7438                                | 6607                                   | 88.83%                         |
| MM1438                      | 1774                                | 1578                                   | 88.95%                         |
| MM1460                      | 2048                                | 1683                                   | 82.18%                         |
| MM1479                      | 5135                                | 4564                                   | 88.88%                         |
| MM1498                      | 7408                                | 2160                                   | 29.16%                         |
| MM1555                      | 7220                                | 6586                                   | 91.22%                         |
| MM1643                      | 3141                                | 2794                                   | 88.95%                         |
| MM1698                      | 2844                                | 2283                                   | 80.27%                         |
| <b>Total cells profiled</b> | <b>58050</b>                        | <b>44074</b>                           | <b>76.86%</b>                  |

605  
606  
607  
608  
609  
610  
611  
612  
613  
614  
615  
616  
617  
618  
619  
620  
621  
622

623 **Table S2. Sensitivity and Specificity of Copy-scAT in aGBM, pGBM and MM samples**  
624

| Samples      | Gains       |             | Losses      |             | Amplifications |             |
|--------------|-------------|-------------|-------------|-------------|----------------|-------------|
|              | Sensitivity | Specificity | Sensitivity | Specificity | Sensitivity    | Specificity |
| aGBM (n = 3) | 1.0         | 0.94        | 0.79        | 0.89        | 1.0            | 1.0         |
| pGBM (n= 6)  | 0.73        | 0.93        | 0.73        | 0.95        | N/A            | 0.975       |
| MM (n = 10)  | 0.51        | 0.94        | 0.67        | 0.89        | N/A            | N/A         |

625  
626  
627  
628  
629  
630  
631  
632  
633  
634  
635  
636  
637  
638  
639  
640  
641  
642  
643  
644  
645  
646  
647  
648  
649  
650  
651  
652  
653  
654  
655  
656  
657  
658  
659  
660  
661  
662  
663  
664  
665  
666  
667

668 **Fig. S1. Comparison of CNVs inferred by Copy-scAT and by WGS for adult GBM samples.**  
669 **(A)** Comparison of chromosome arm level losses detected in three adult GBM samples by single cell  
670 ATAC, WGS, or both methods.  
671 **(B)** Comparison of focal amplifications detected in three adult GBM sample by scATAC, WGS, or both  
672 methods.  
673

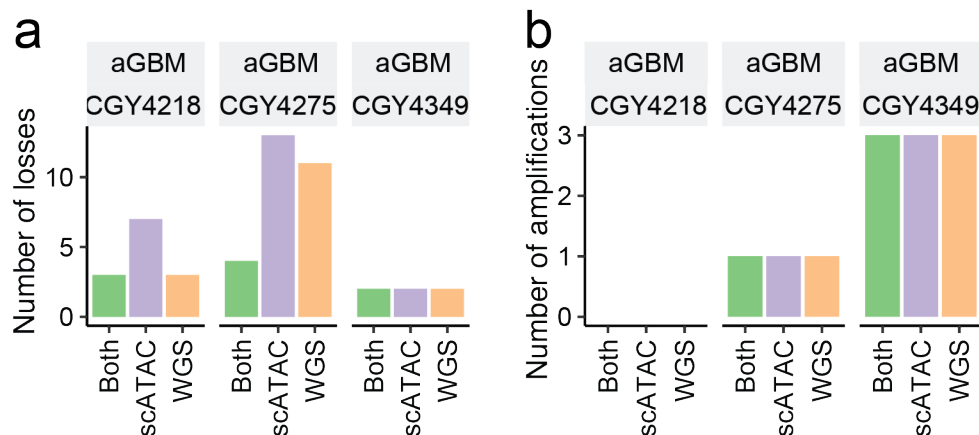

674  
675  
676  
677  
678  
679  
680  
681  
682  
683  
684  
685  
686  
687  
688  
689  
690  
691  
692  
693  
694  
695  
696  
697  
698  
699  
700  
701  
702  
703  
704  
705  
706

707 **Fig. S2. Comparison of CNVs inferred by Copy-scAT or WGS in pediatric GBM samples.**  
708 **(a) Gains detected in three pediatric GBM samples compared to linked-reads WGS.**  
709 **(b) Losses detected in three pediatric GBM samples compared to linked-reads WGS.**  
710

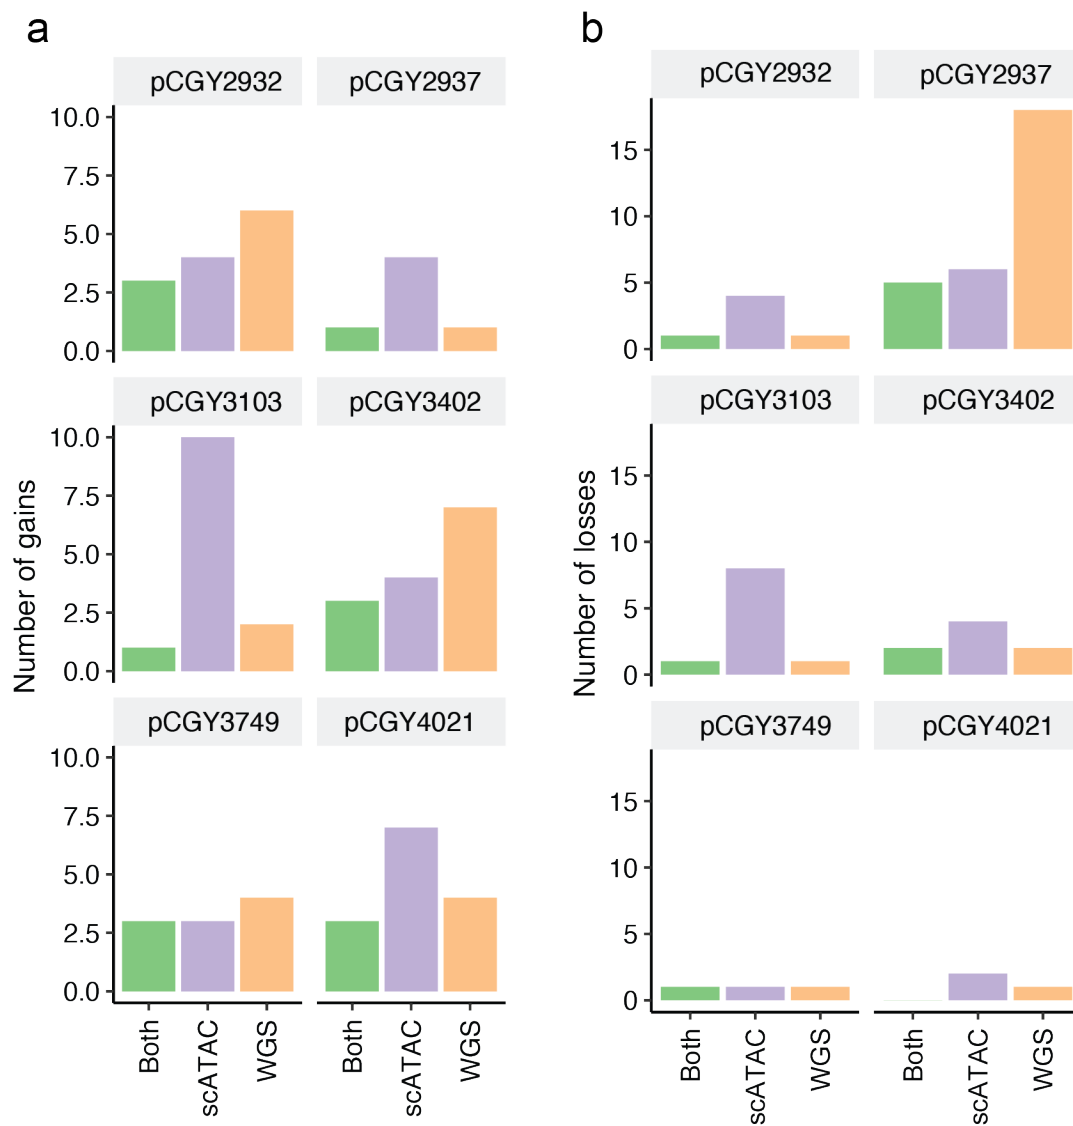

711  
712  
713  
714  
715  
716  
717  
718  
719  
720  
721  
722  
723  
724  
725  
726

727 **Fig. S3. Comparison of CNVs inferred by Copy-scAT or with the scCNV assay in multiple**  
 728 **myeloma samples.**  
 729 **(a)** Comparison of gains seen in additional myeloma samples versus 10x single-cell CNV sequencing. **(b)**  
 730 Comparison of chromosome losses seen in additional myeloma samples versus 10x single-cell CNV  
 731 sequencing. **(c,d)** Number of gains and losses detected by both methods compared to number of cells in  
 732 scATAC-seq sample. **(e-f)** Number of shared gains or losses detected between the two methods, plotted  
 733 versus the number of cells in the scATAC-seq experiment. **(g-h)** Number of shared gains or losses  
 734 detected between the two methods, plotted versus the number of reads per cell in the scATAC.

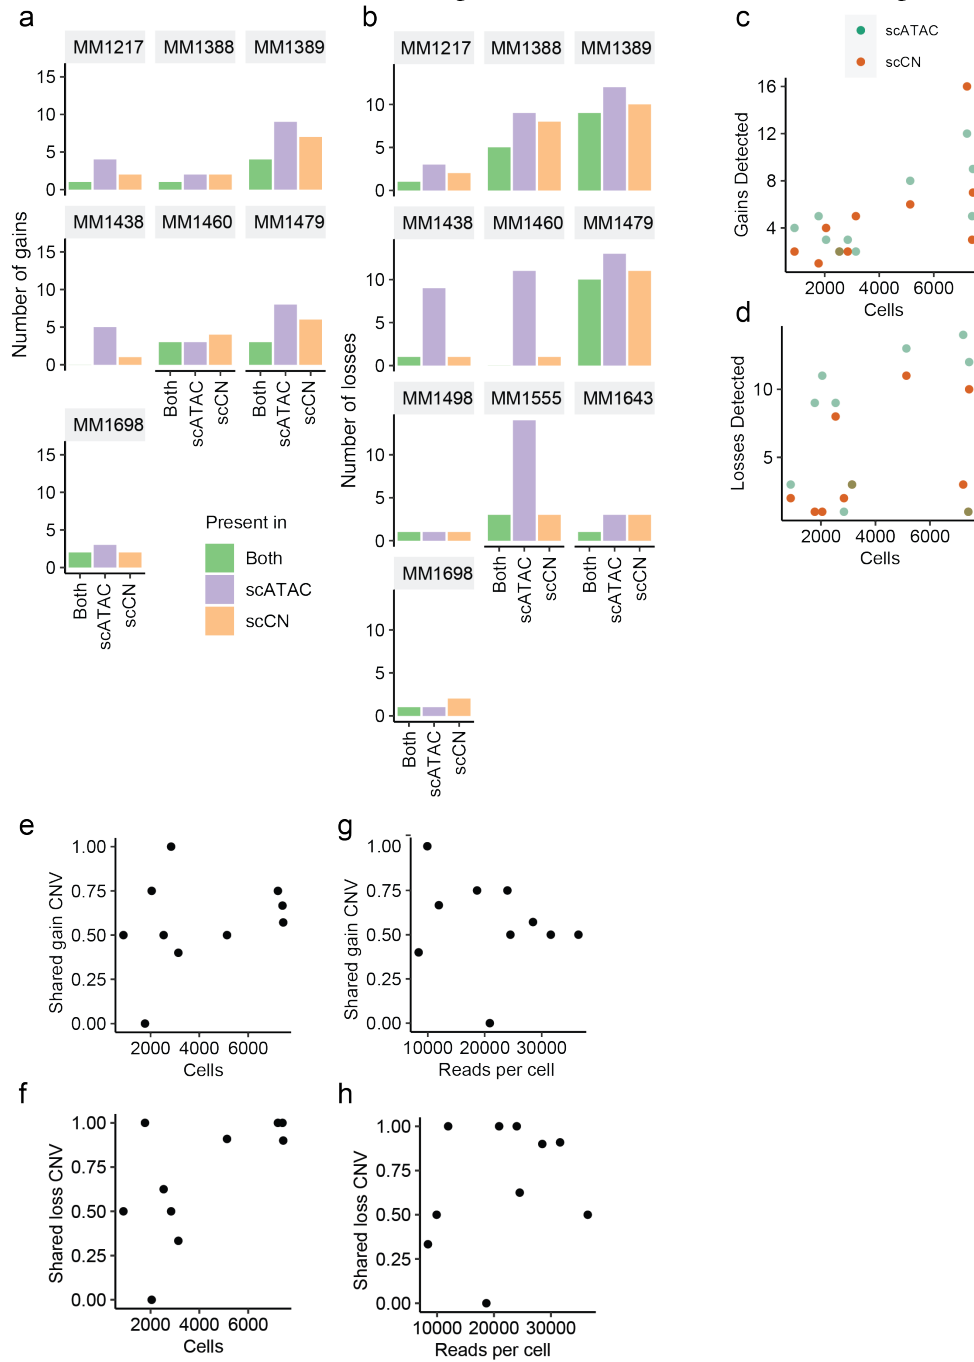

735  
 736  
 737  
 738  
 739

740 **Fig. S4. CNVs are detected in scATAC clusters with Copy-scAT in pediatric GBM samples.**  
741 **(a)** Overview of cell assignments in two paired patient libraries.  
742 **(b-d)** Representative WGS-confirmed alterations detected in pCGY2932 and pCGY2937.  
743

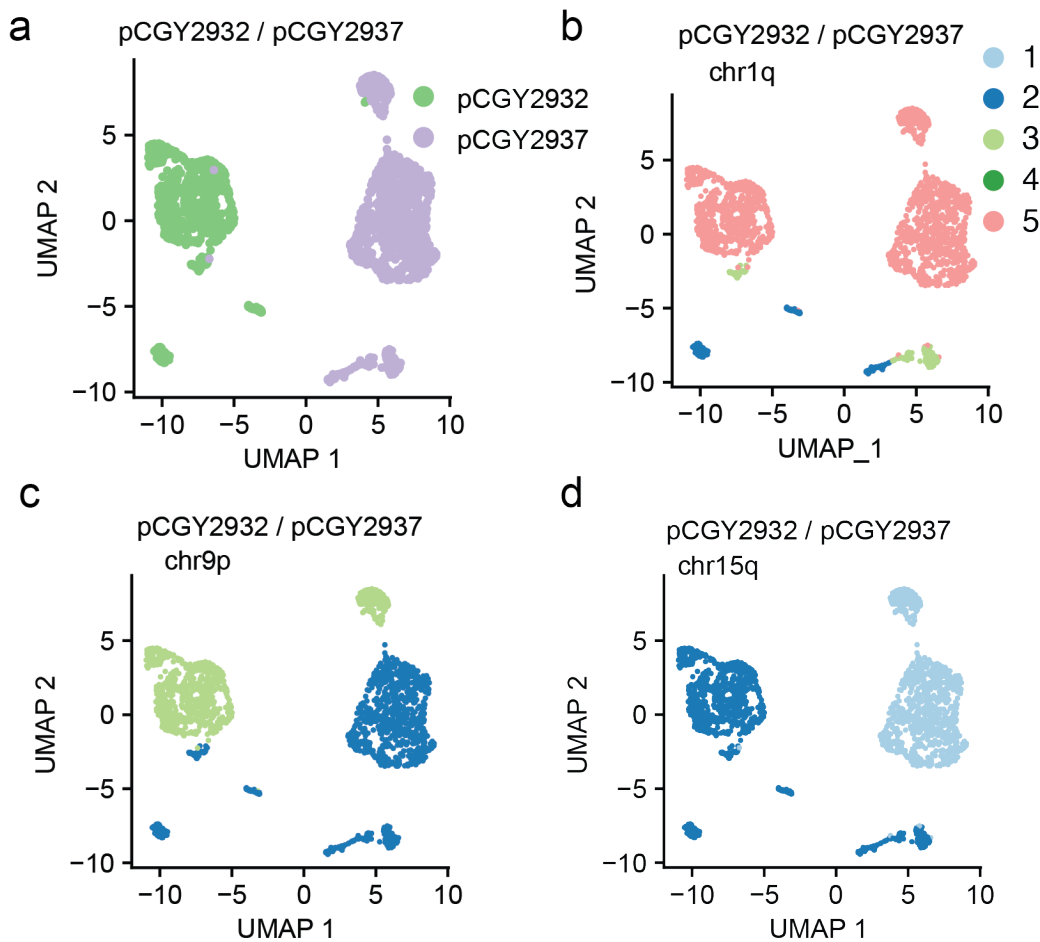

744  
745  
746  
747  
748  
749  
750  
751  
752  
753  
754  
755  
756  
757  
758  
759  
760  
761  
762  
763

764 **Fig. S5. CNVs are identified by Copy-scAT in specific scATAC clusters in multiple myeloma**  
765 **samples. (a) Gain of chromosome 11p restricted to neoplastic cell populations. (b) Similar pattern with**  
766 **gain of chromosome 11q. (c) Similar pattern with loss of chr13q.**  
767

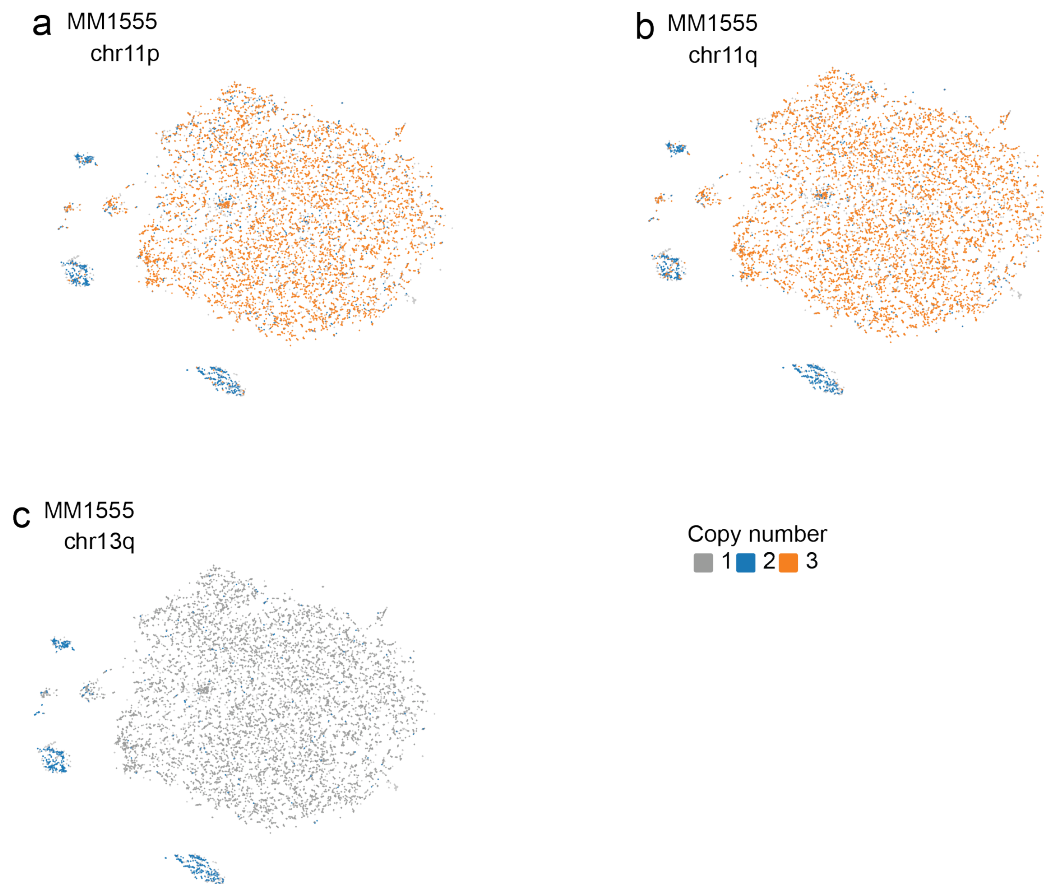

768  
769  
770  
771  
772  
773  
774  
775  
776  
777  
778  
779  
780  
781  
782  
783  
784  
785  
786  
787



788 **Fig. S6. Additional chromosome copy number analyses for CGY4218.**

789 **(a)** Initial neighbourhood clustering results from Signac.

790 **(b-f)** Representative chromosome-level copy number alteration profiles for tumour and normal cells. **(g-n)**

791 Representative motif scores from ChromVAR for different motifs, including **(g)** ELF5, **(h)** SPIB, **(i)**

792 **ASCL1**, **(j)** IKZF1, **(k)** NEUROD1, **(l)** NFIC, **(m)** NFYA, **(n)** ELK3.

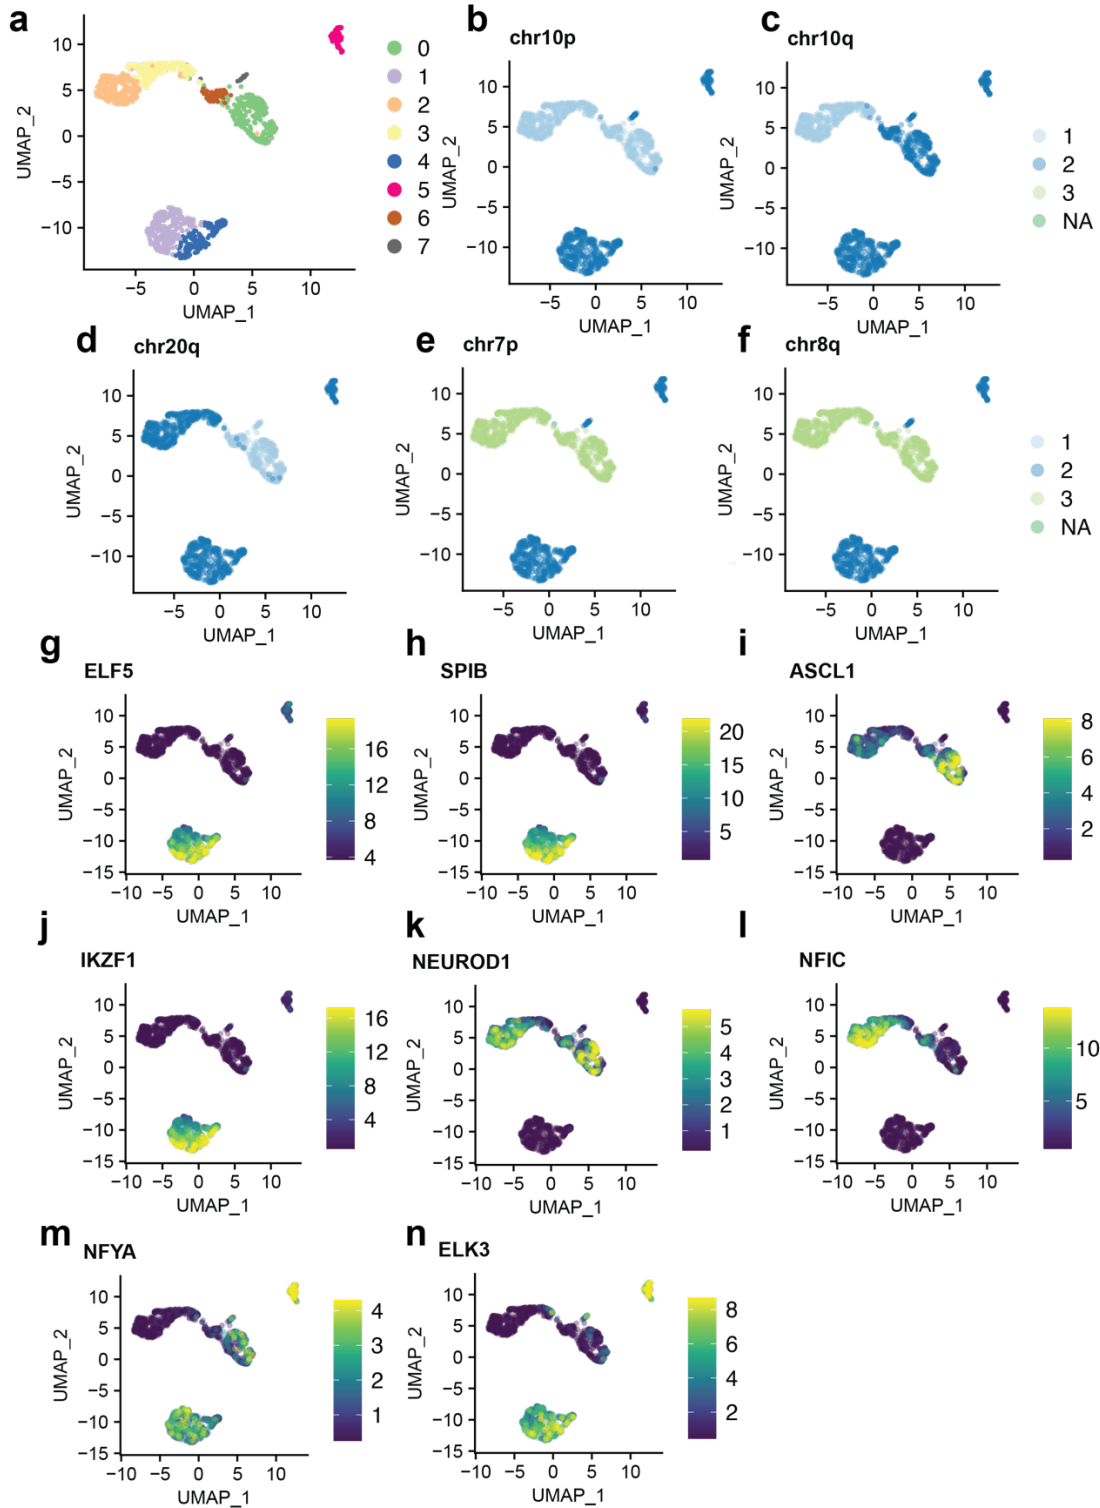

793  
794  
795  
796

797 **Fig. S7. Representative copy number information and distribution for aGBM sample CGY4250.**  
798 **(a)** Neighbourhood clustering results from Signac.  
799 **(b-c)** Distribution of amplifications in *EGFR* and *MDM2*.  
800 **(d-i)** Representative chromosome-level copy number alteration profiles for tumour and normal cells. **(j-l)**  
801 Representative motif scores from ChromVAR for different motifs, including **(j)** NFIC, **(k)** SPIB and **(l)**  
802 FOXG1.

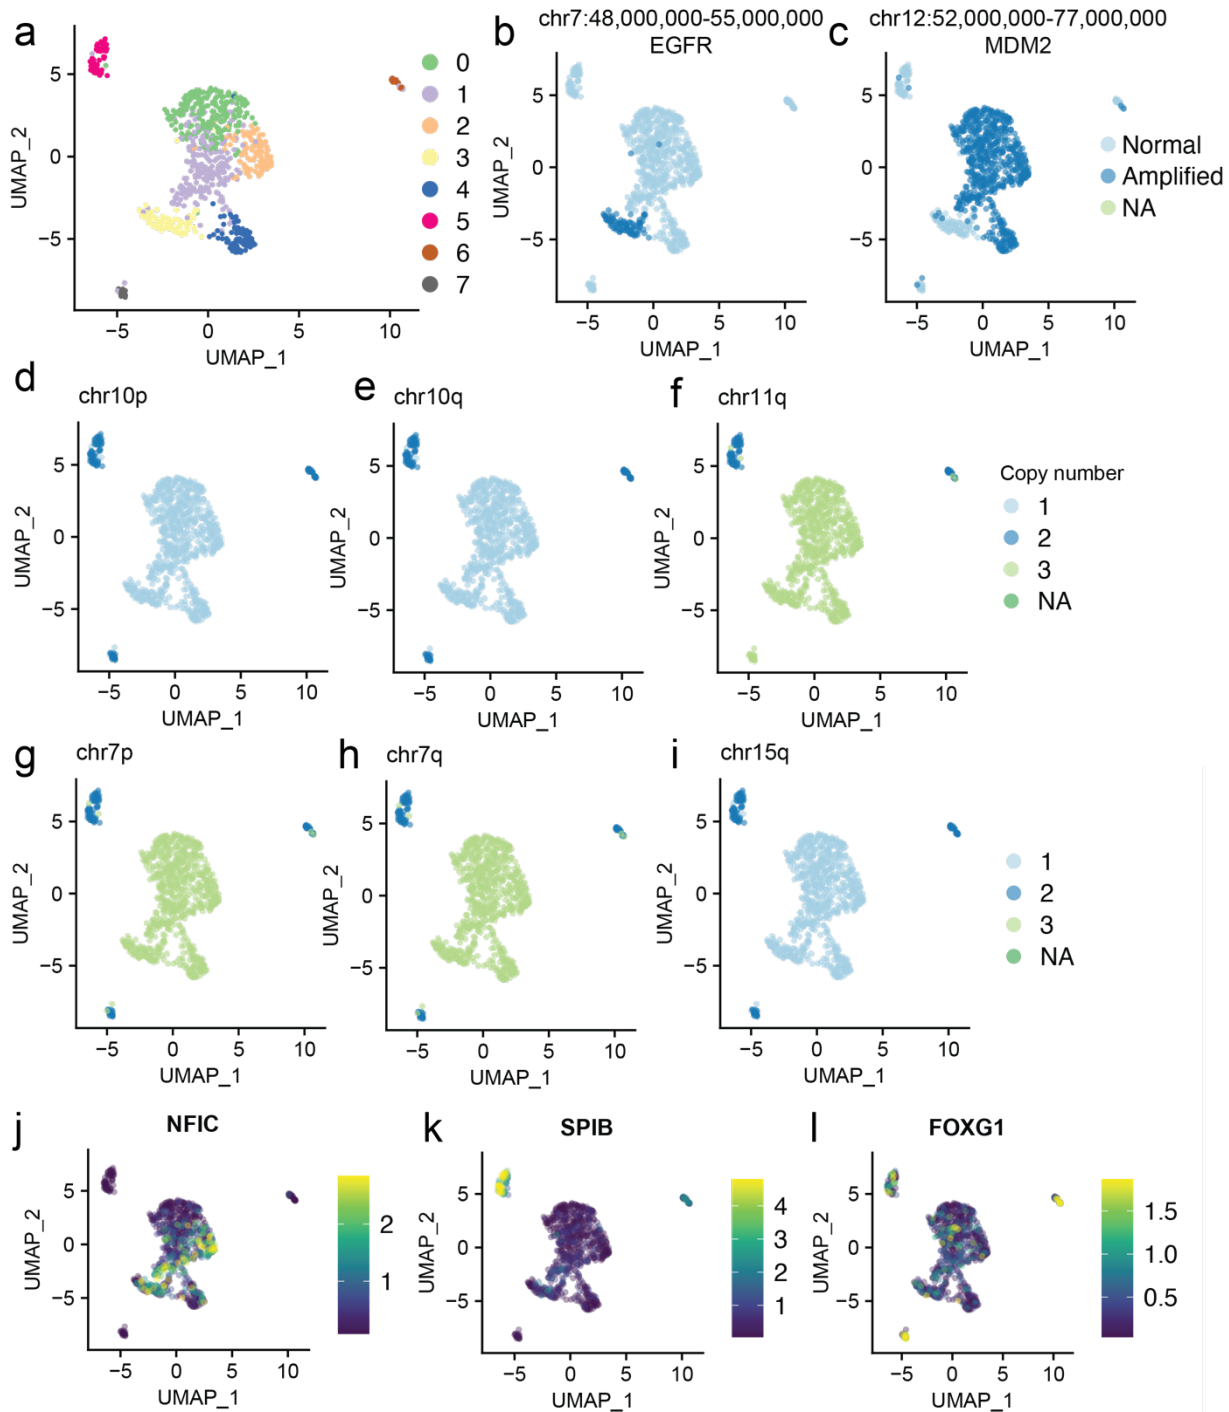

803  
804  
805  
806  
807

808 **Fig. S8. Representative copy number information and distribution for aGBM sample CGY4275.**  
809 **(a)** Neighbourhood clustering results from Signac.  
810 **(b)** Distribution of amplifications in *EGFR*.  
811 **(c-j)** Representative chromosome-level copy number alteration profiles for tumour and normal cells. **(g-l)**  
812 Representative motif scores from ChromVAR for different motifs, including **(g)** NFIC, **(h)** FOS::JUN, **(i)**  
813 NEUROD1, **(j)** ELF5, **(k)** SPIB, and **(l)** IKZF1.  
814

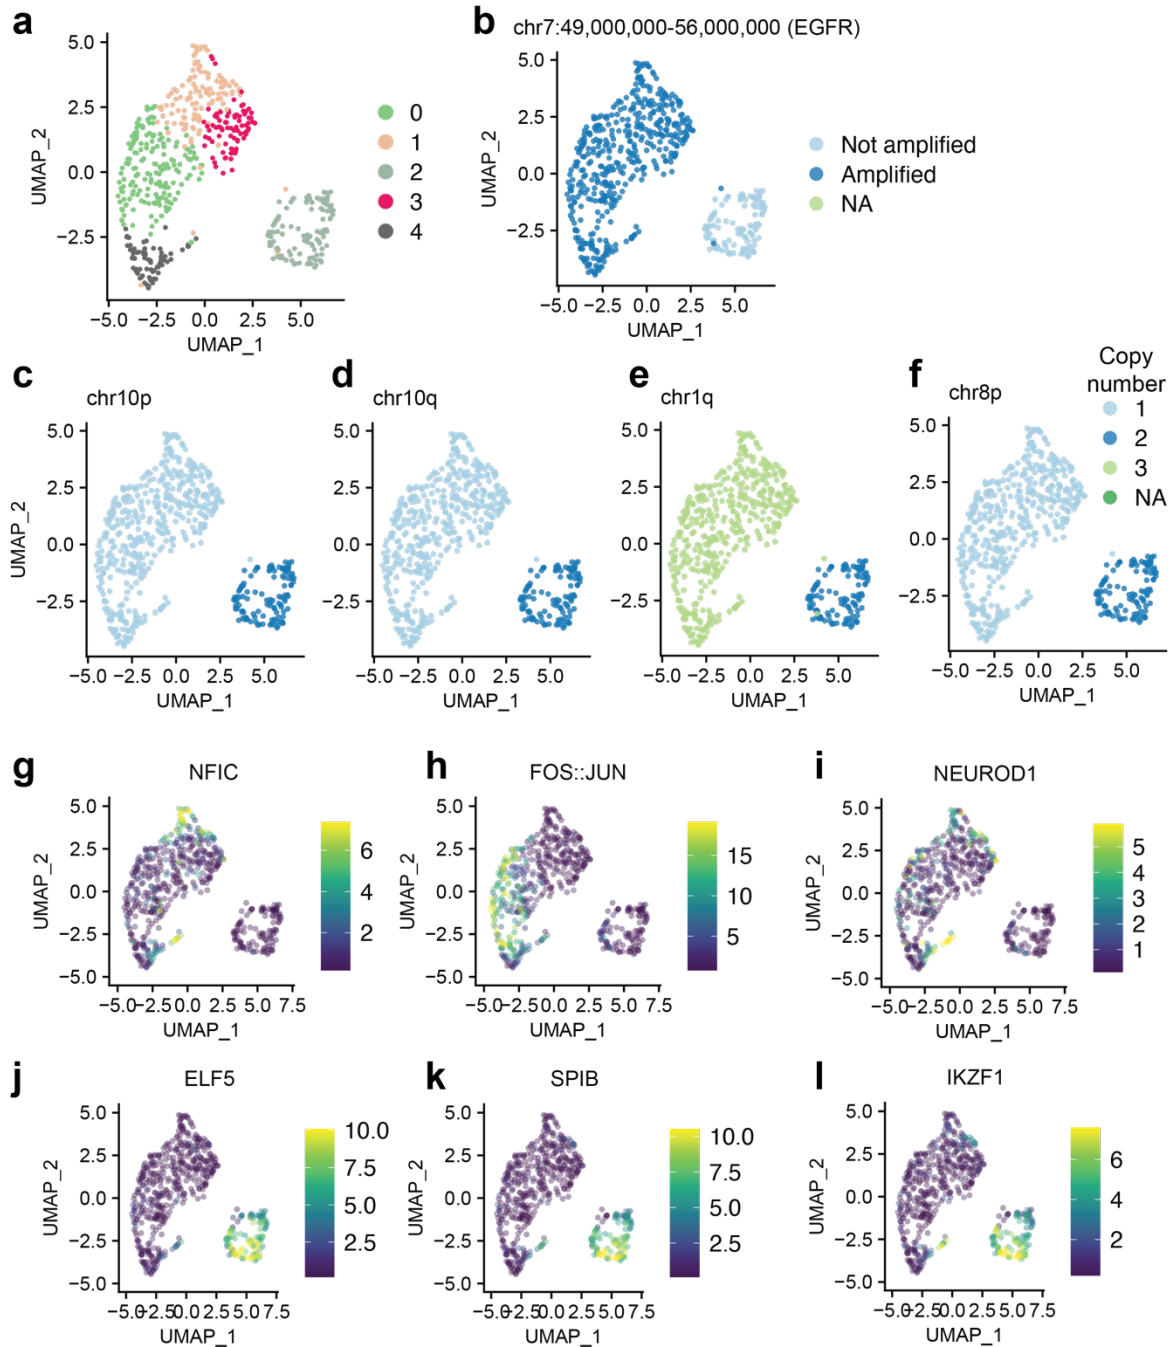

815  
816  
817  
818  
819  
820

821 **Fig. S9. Effects of removing CNVs on variance in aGBM sample CGY4349.**

822 **(a)** Distribution of the top 2000 most variable peaks in the tumour cells after filtering out non-neoplastic  
823 cells; p value from Chi-squared test.

824 **(b)** Distribution of top 2000 most variable peaks in non-neoplastic cells after filtering (P VALUE FROM  
825 CHI-SQUARED TEST). Chromosomes with CNVs or amplification regions are highlighted in pink.

826 **(c)** Distribution of top 2000 most variable peaks in tumour cells after filtering of non-neoplastic cells and  
827 removal of regions containing CNVs (P VALUE FROM CHI-SQUARED TEST).

828

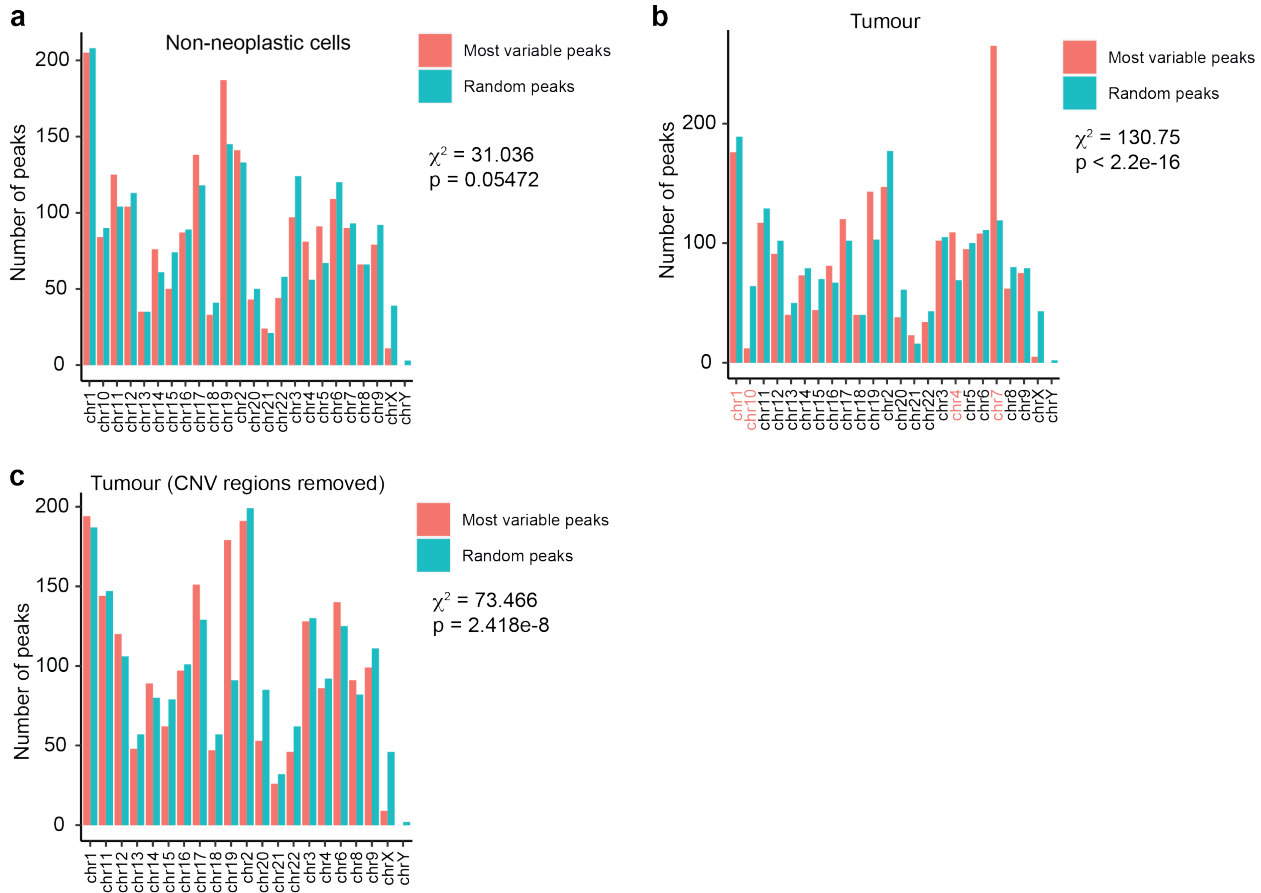

829

830

831

832

833

834

835

836

837

838

839

840

841

842

843

844

845

846

847 **Fig. S10. Validation of Copy-scAT and identification of putative proliferative cells in non-**  
848 **neoplastic datasets. (a)** Chromosome copy number distribution in a 10X dataset of 5000 human PBMCs.  
849 **(b)** Seurat clusters for the 10X dataset of 5000 human PBMCs. **(c)** Estimate of cycle status for the 10X  
850 dataset of 5000 human PBMCs. **(d)** Chromosome copy number distribution in a 10X dataset of mouse  
851 embryonic brain at E18. **(e,f)** Predicted cycle status and cluster assignments in E18 mouse brain. **(g,h)**  
852 Predicted cell cycle status and cluster profile in P50 mouse brain dataset from 10X.  
853

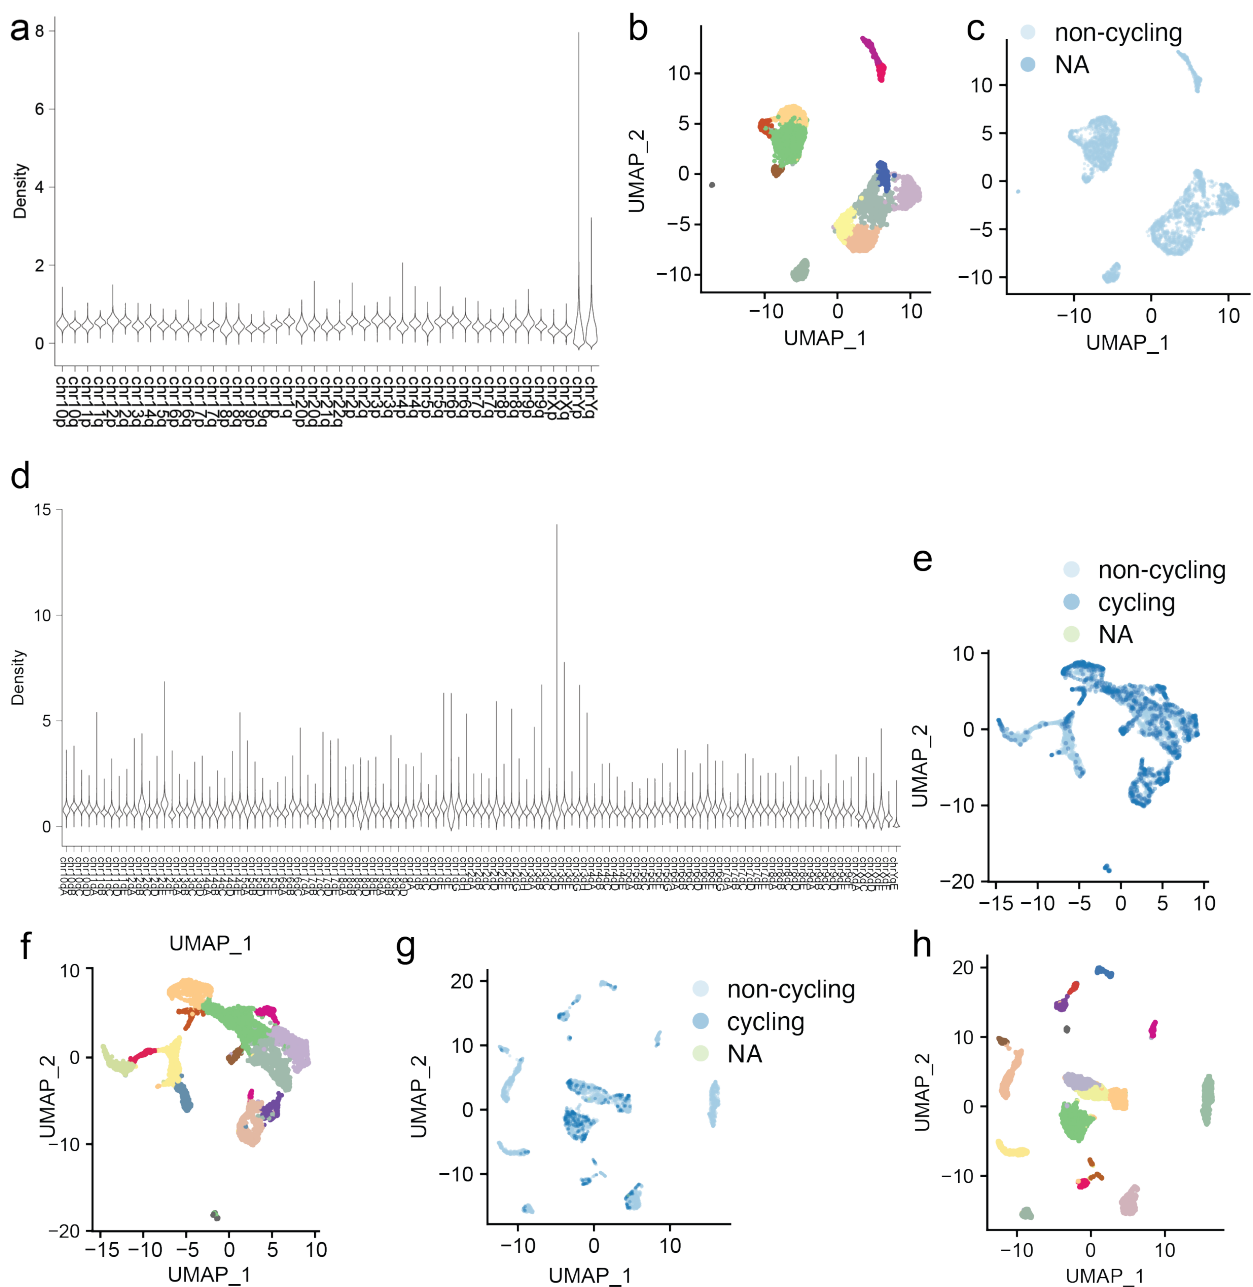

854  
855  
856  
857  
858  
859  
860

861 **Fig. S11. Pseudotime trajectory analysis of aGBM sample CGY4250.** Distribution of EGFR  
862 amplification **(a)** and cell cycle status **(b)** amongst branches. Distribution of ChromVAR motif scores in  
863 branches for proneural motifs ASCL1 and OLIG2 **(c,d)**, ETV1 **(e)**, NFIX **(f)**, and mesenchymal motifs  
864 JUN::JUNB **(g)** and STAT3 **(h)**.  
865

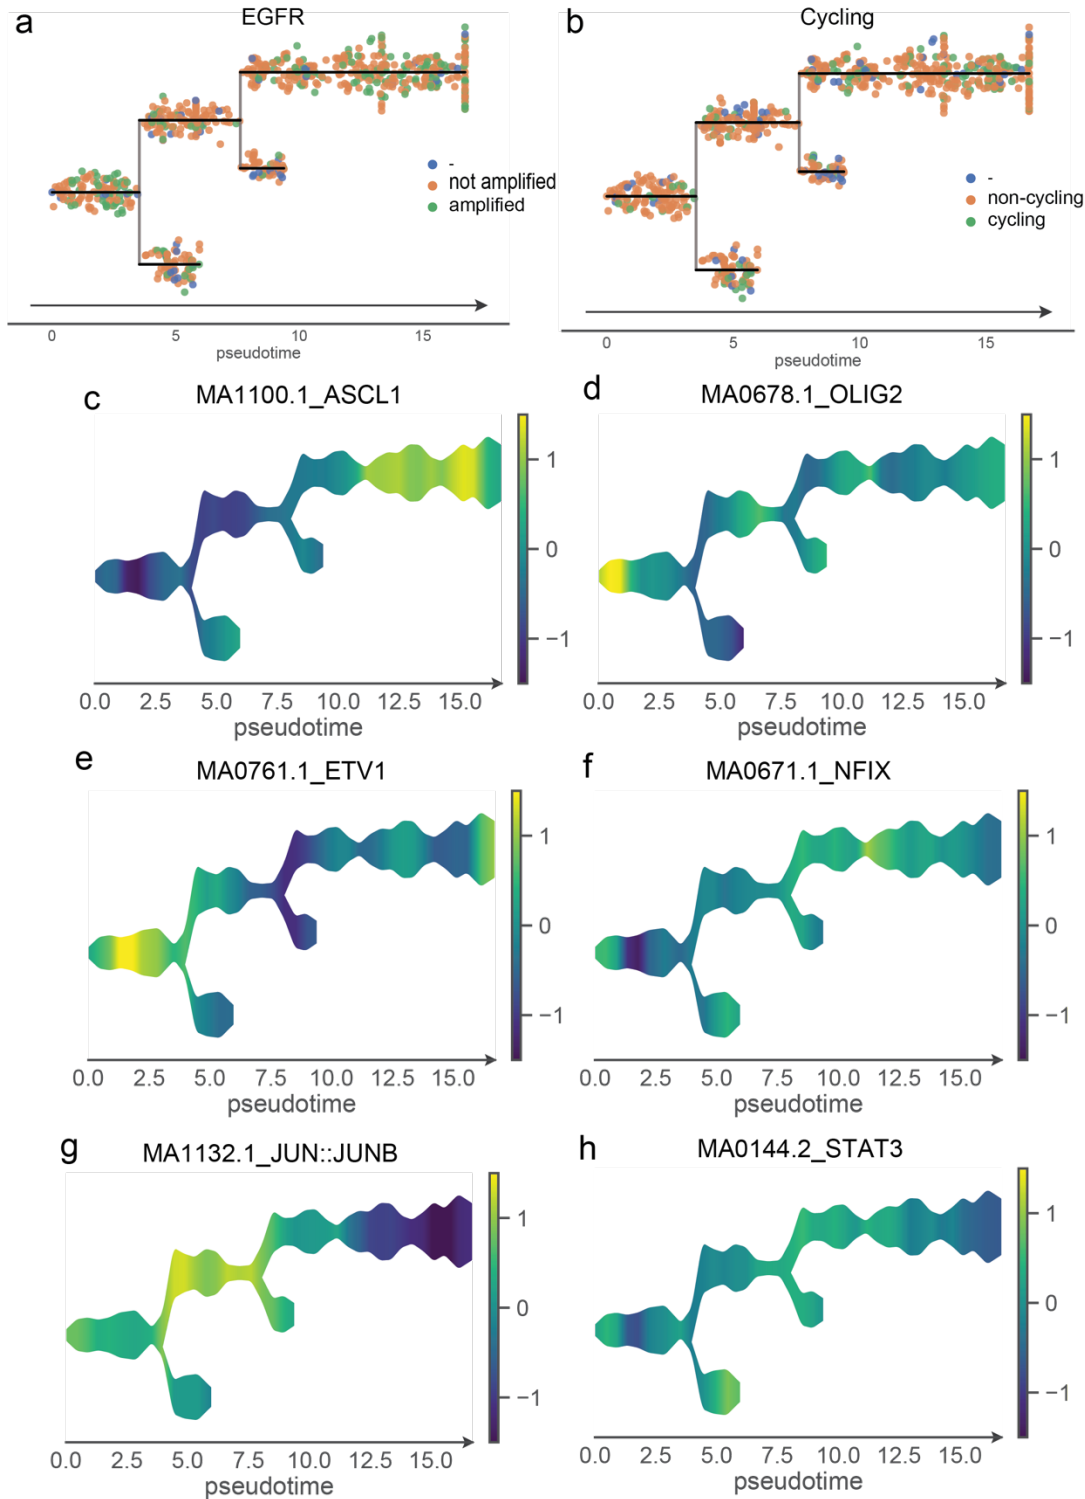

866  
867  
868  
869

870 **Fig. S12. Pseudotime trajectory analysis of aGBM sample CGY4349.** Distribution of PDGFRA  
871 amplification (a) and cycling status (b) amongst branches. Distribution of ChromVAR motif scores in  
872 branches for proneural motifs ASCL1 and OLIG2 (c,d), ETV1 (e), NFIX (f), and mesenchymal motifs  
873 JUN::JUNB (g) and STAT3 (h).  
874

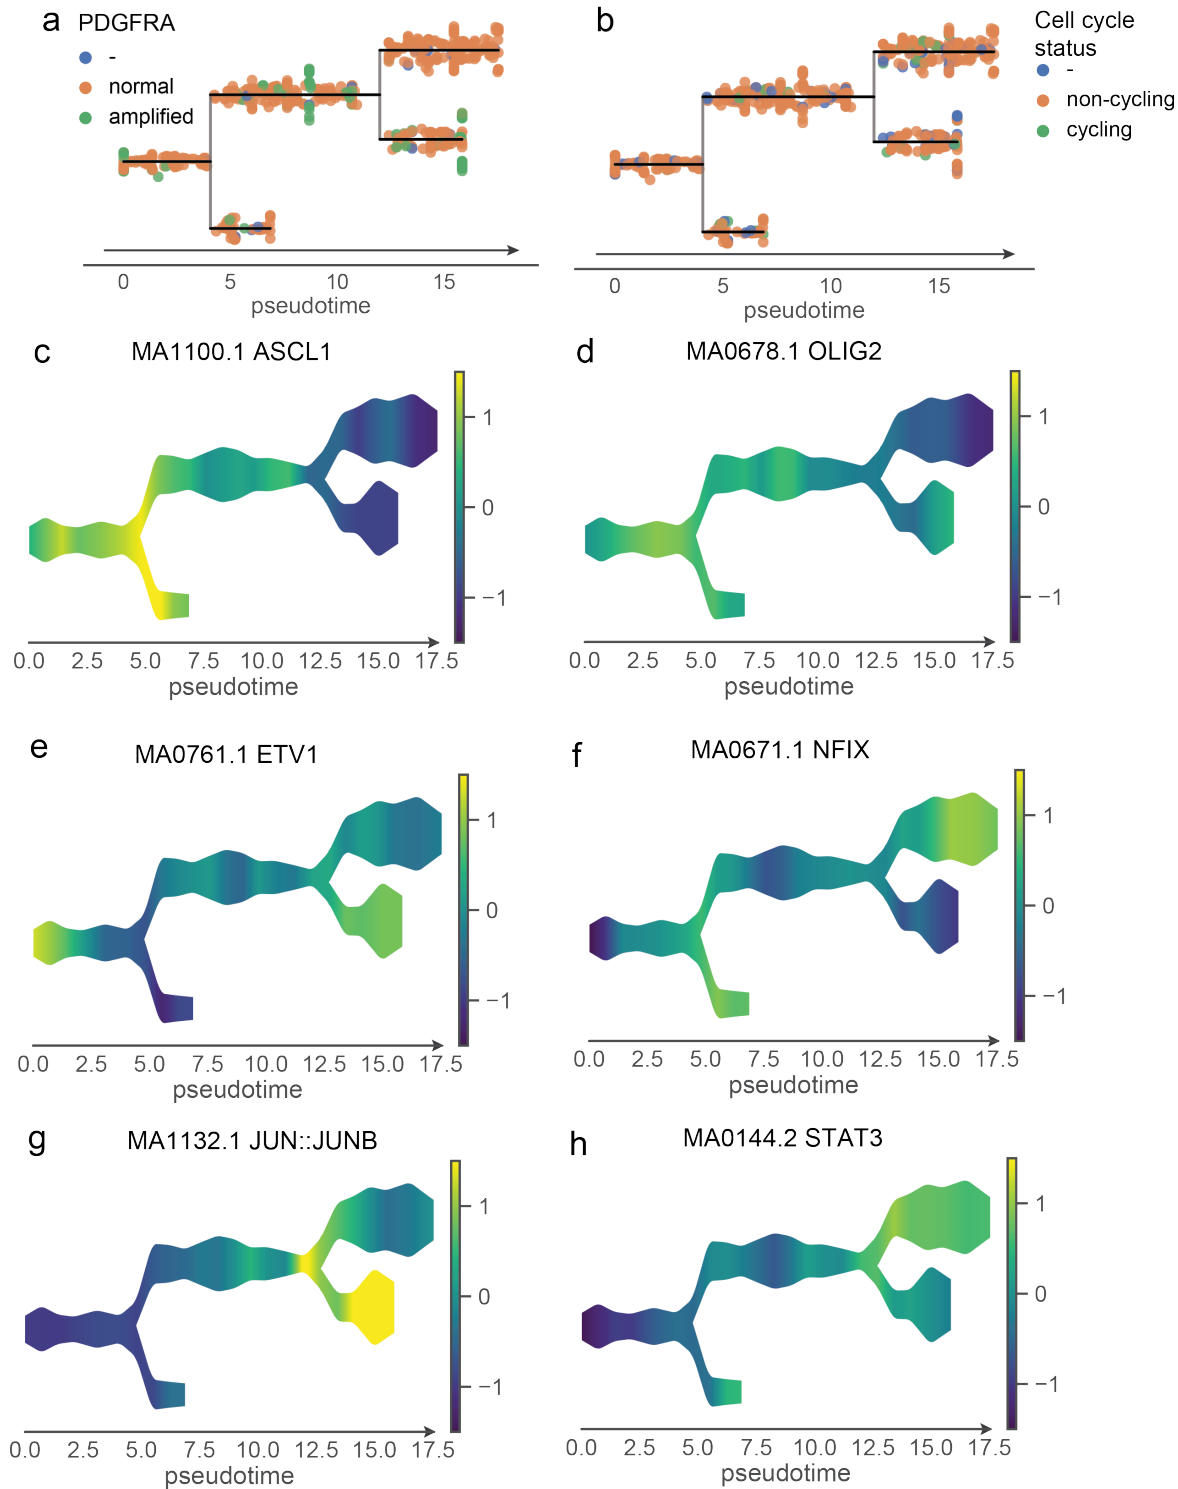

875  
876  
877  
878

879 **Fig. S13. Pseudotime trajectory analysis of aGBM sample CGY4275.** Distribution of ChromVAR  
880 motif scores in branches for proneural motifs ASCL1 and OLIG2 (a,b), ETV1 (c), NFIX (d), and  
881 mesenchymal motifs JUN::JUNB (e) and STAT3 (f).  
882

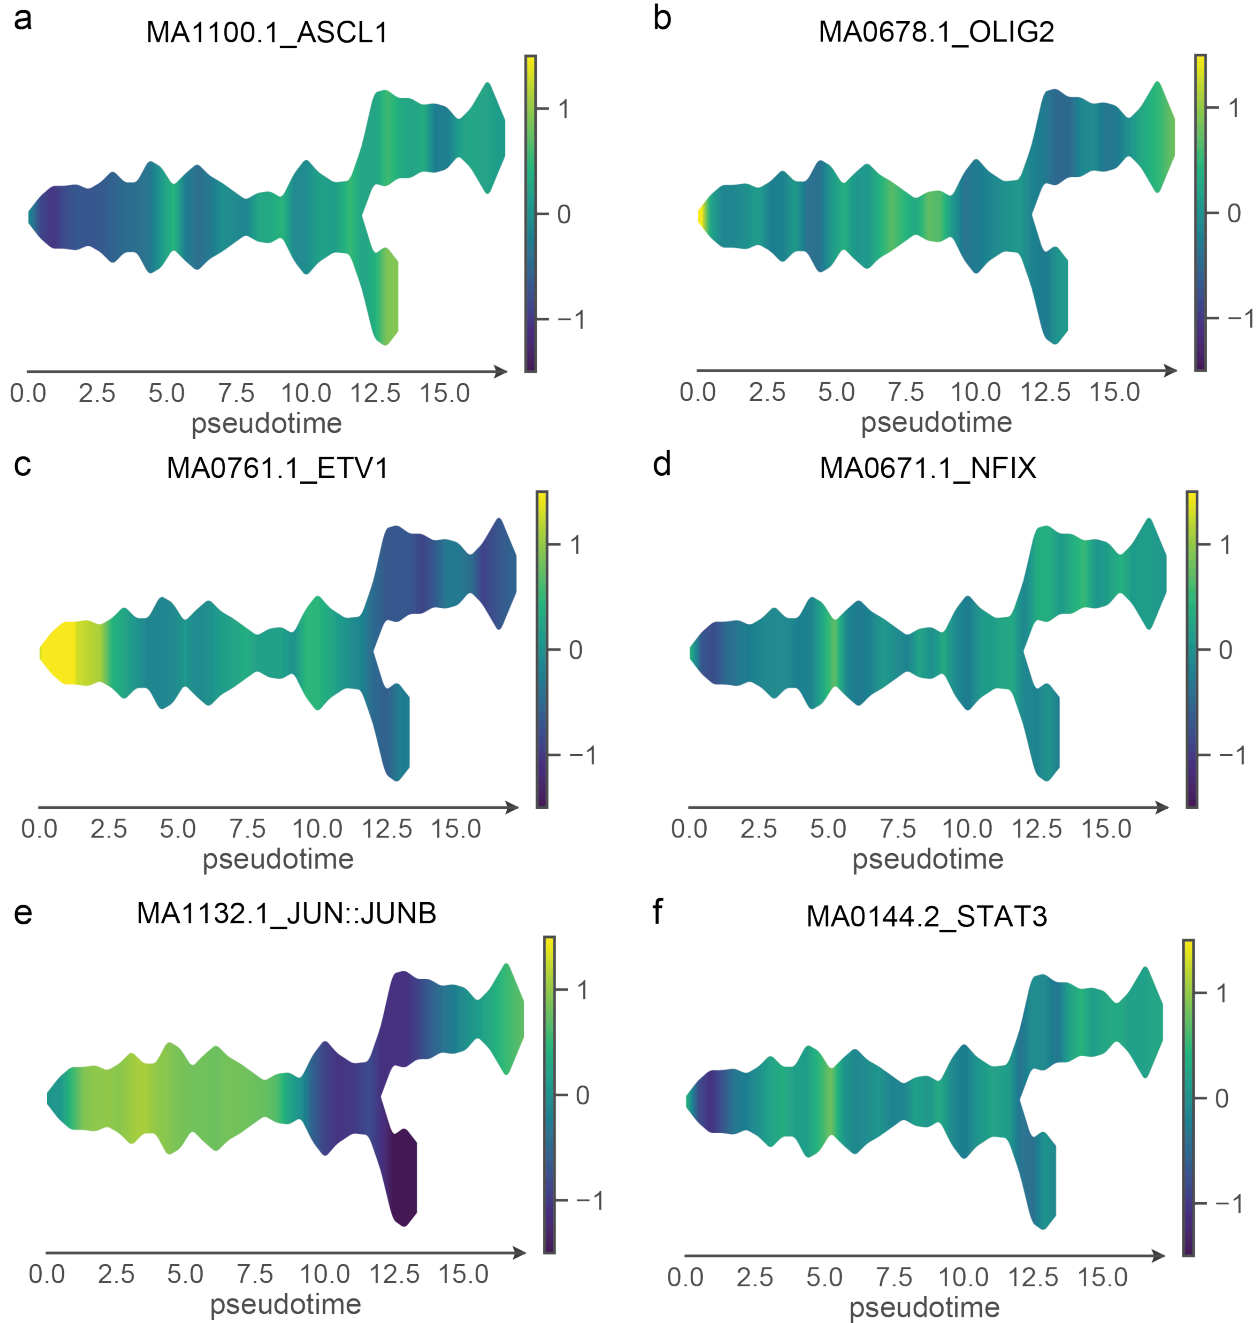

883  
884  
885  
886  
887  
888
